# Supplementary material for: Job satisfaction and intention to quit: an empirical analysis of nurses in Turkey
Source: PubMed Central journal article supplement (PMC4860322; doi:10.7717/peerj.1896), 2016-04-26
Supplement: peerj-04-1896-s001.pdf [file peerj-04-1896-s001.pdf]

## Supporting Information

### Demographic results

| Particular                | Percentage (%) | Frequency |
|---------------------------|----------------|-----------|
| <i>Gender</i>             |                |           |
| Male                      | 37             | 155       |
| Female                    | 63             | 262       |
| <i>Age Group</i>          |                |           |
| 21-25                     | 23.5           | 98        |
| 26-30                     | 30.7           | 128       |
| 31-35                     | 19.6           | 82        |
| 36-40                     | 14.0           | 58        |
| 41-45                     | 7.6            | 32        |
| ≥ 46                      | 4.6            | 19        |
| <i>Marital status</i>     |                |           |
| Single                    | 32.8           | 137       |
| Married                   | 55.4           | 231       |
| Widowed                   | 7.2            | 30        |
| Divorced                  | 4.6            | 19        |
| <i>Education level</i>    |                |           |
| Diploma/ Associate degree | 58             | 242       |
| Graduate (Baccalaureate)  | 35.3           | 147       |
| Master of science         | 6.7            | 28        |
| <i>Working experience</i> |                |           |
| ≥ 5 year                  | 23.5           | 98        |
| 6 – 15 year               | 32.6           | 136       |
| 16 – 25 year              | 26.9           | 112       |
| 26 – 35 years             | 10.1           | 42        |
| ≤ 36 years                | 6.9            | 29        |
| <i>Unit</i>               |                |           |
| General Ward              | 25.7           | 107       |
| Pediatric Ward            | 7.2            | 30        |
| Incentive care            | 24.2           | 101       |
| Day Ward                  | 42.9           | 179       |
| <i>Schedule</i>           |                |           |
| Permanent morning         | 24.2           | 101       |
| Permanent night           | 18.5           | 77        |
| Rotating day              | 57.3           | 239       |

## Supporting Information

Response for job satisfaction factors

### *Response to questionnaire (1-12)*

|               | Pay1 | Pay2 | Pay3 | Pay4 | Pro1 | Pro2 | Pro3 | Pro4 | Sup1 | Sup2 | Sup3 | Sup4 |
|---------------|------|------|------|------|------|------|------|------|------|------|------|------|
| Respondent 1  | 2    | 2    | 1    | 2    | 1    | 3    | 3    | 3    | 4    | 2    | 2    | 4    |
| Respondent 2  | 3    | 3    | 2    | 3    | 2    | 3    | 5    | 4    | 3    | 4    | 4    | 3    |
| Respondent 3  | 2    | 2    | 3    | 2    | 2    | 4    | 1    | 2    | 3    | 1    | 3    | 5    |
| Respondent 4  | 2    | 2    | 4    | 2    | 2    | 3    | 3    | 2    | 3    | 2    | 5    | 5    |
| Respondent 5  | 3    | 3    | 1    | 3    | 3    | 5    | 4    | 4    | 4    | 4    | 5    | 4    |
| Respondent 6  | 1    | 3    | 2    | 3    | 1    | 1    | 2    | 1    | 3    | 3    | 4    | 5    |
| Respondent 7  | 2    | 4    | 2    | 4    | 2    | 3    | 4    | 3    | 5    | 4    | 3    | 6    |
| Respondent 8  | 1    | 3    | 2    | 3    | 2    | 4    | 2    | 4    | 2    | 2    | 5    | 4    |
| Respondent 9  | 2    | 5    | 3    | 4    | 2    | 3    | 4    | 2    | 3    | 2    | 6    | 3    |
| Respondent 10 | 2    | 1    | 4    | 1    | 1    | 3    | 3    | 2    | 4    | 4    | 4    | 5    |
| Respondent 11 | 3    | 3    | 1    | 3    | 2    | 2    | 5    | 3    | 2    | 1    | 3    | 5    |
| Respondent 12 | 3    | 4    | 2    | 4    | 2    | 3    | 1    | 4    | 4    | 3    | 5    | 6    |
| Respondent 13 | 3    | 1    | 3    | 2    | 2    | 3    | 3    | 1    | 2    | 4    | 2    | 3    |
| Respondent 14 | 1    | 2    | 2    | 2    | 3    | 4    | 4    | 3    | 4    | 2    | 4    | 5    |
| Respondent 15 | 1    | 2    | 2    | 4    | 4    | 3    | 2    | 4    | 3    | 2    | 3    | 5    |
| Respondent 16 | 1    | 2    | 3    | 1    | 1    | 5    | 3    | 2    | 5    | 4    | 5    | 4    |
| Respondent 17 | 2    | 3    | 3    | 3    | 2    | 1    | 1    | 2    | 4    | 1    | 5    | 5    |
| Respondent 18 | 3    | 4    | 4    | 4    | 3    | 3    | 3    | 2    | 3    | 3    | 4    | 6    |
| Respondent 19 | 4    | 1    | 3    | 2    | 2    | 4    | 5    | 3    | 3    | 4    | 1    | 4    |
| Respondent 20 | 1    | 2    | 4    | 2    | 2    | 2    | 3    | 4    | 3    | 1    | 2    | 3    |
| Respondent 21 | 1    | 3    | 1    | 4    | 1    | 3    | 4    | 1    | 4    | 3    | 6    | 5    |
| Respondent 22 | 5    | 2    | 3    | 1    | 1    | 3    | 2    | 3    | 4    | 2    | 4    | 5    |
| Respondent 23 | 1    | 2    | 4    | 3    | 2    | 4    | 2    | 3    | 3    | 4    | 3    | 6    |
| Respondent 24 | 2    | 3    | 2    | 4    | 2    | 2    | 4    | 4    | 5    | 1    | 5    | 3    |
| Respondent 25 | 1    | 3    | 2    | 1    | 2    | 3    | 1    | 2    | 2    | 2    | 3    | 5    |
| Respondent 26 | 2    | 4    | 1    | 3    | 3    | 3    | 3    | 2    | 3    | 4    | 4    | 5    |
| Respondent 27 | 3    | 3    | 2    | 4    | 1    | 4    | 4    | 4    | 4    | 3    | 2    | 4    |
| Respondent 28 | 2    | 4    | 3    | 2    | 2    | 3    | 2    | 1    | 2    | 3    | 3    | 5    |
| Respondent 29 | 2    | 1    | 4    | 2    | 2    | 5    | 2    | 3    | 4    | 3    | 5    | 6    |
| Respondent 30 | 3    | 3    | 1    | 4    | 2    | 1    | 4    | 4    | 2    | 4    | 2    | 4    |
| Respondent 31 | 1    | 4    | 2    | 1    | 1    | 3    | 1    | 2    | 4    | 3    | 3    | 4    |
| Respondent 32 | 2    | 2    | 3    | 3    | 2    | 4    | 3    | 2    | 3    | 5    | 5    | 3    |
| Respondent 33 | 1    | 2    | 2    | 4    | 2    | 2    | 4    | 3    | 5    | 2    | 4    | 5    |
| Respondent 34 | 2    | 1    | 2    | 2    | 2    | 3    | 1    | 4    | 4    | 3    | 3    | 5    |
| Respondent 35 | 2    | 2    | 3    | 4    | 3    | 3    | 3    | 3    | 3    | 4    | 5    | 6    |
| Respondent 36 | 3    | 3    | 3    | 1    | 4    | 4    | 4    | 4    | 3    | 2    | 5    | 3    |
| Respondent 37 | 3    | 4    | 4    | 3    | 1    | 3    | 2    | 2    | 3    | 4    | 4    | 5    |
| Respondent 38 | 3    | 1    | 3    | 4    | 2    | 5    | 2    | 2    | 4    | 2    | 3    | 5    |
| Respondent 39 | 1    | 2    | 1    | 2    | 3    | 1    | 4    | 4    | 3    | 4    | 5    | 4    |
| Respondent 40 | 1    | 3    | 2    | 2    | 2    | 3    | 1    | 1    | 5    | 3    | 6    | 3    |
| Respondent 41 | 1    | 2    | 3    | 4    | 2    | 4    | 3    | 3    | 2    | 5    | 4    | 5    |
| Respondent 42 | 2    | 2    | 4    | 1    | 1    | 2    | 4    | 4    | 3    | 4    | 3    | 3    |
| Respondent 43 | 3    | 3    | 1    | 3    | 2    | 3    | 2    | 2    | 4    | 3    | 5    | 5    |
| Respondent 44 | 4    | 3    | 2    | 4    | 2    | 1    | 4    | 2    | 2    | 3    | 2    | 5    |
| Respondent 45 | 1    | 4    | 2    | 2    | 2    | 2    | 3    | 3    | 4    | 3    | 4    | 6    |
| Respondent 46 | 1    | 3    | 2    | 4    | 3    | 3    | 4    | 4    | 2    | 4    | 3    | 3    |

|                |   |   |   |   |   |   |   |   |   |   |   |   |
|----------------|---|---|---|---|---|---|---|---|---|---|---|---|
| Respondent 47  | 5 | 1 | 3 | 4 | 1 | 4 | 2 | 3 | 4 | 4 | 4 | 5 |
| Respondent 48  | 1 | 2 | 4 | 2 | 2 | 1 | 2 | 4 | 3 | 3 | 3 | 5 |
| Respondent 49  | 2 | 3 | 3 | 2 | 2 | 2 | 4 | 2 | 5 | 5 | 4 | 4 |
| Respondent 50  | 1 | 4 | 2 | 3 | 2 | 2 | 1 | 2 | 4 | 2 | 1 | 3 |
| Respondent 51  | 2 | 1 | 3 | 2 | 1 | 2 | 3 | 4 | 3 | 3 | 2 | 5 |
| Respondent 52  | 3 | 2 | 2 | 2 | 2 | 1 | 4 | 1 | 3 | 3 | 6 | 5 |
| Respondent 53  | 2 | 2 | 4 | 3 | 2 | 2 | 2 | 3 | 3 | 3 | 4 | 6 |
| Respondent 54  | 2 | 2 | 1 | 3 | 2 | 3 | 2 | 4 | 4 | 4 | 3 | 3 |
| Respondent 55  | 3 | 3 | 2 | 2 | 3 | 3 | 4 | 2 | 3 | 3 | 5 | 5 |
| Respondent 56  | 1 | 4 | 2 | 3 | 4 | 3 | 1 | 2 | 5 | 5 | 3 | 5 |
| Respondent 57  | 2 | 3 | 2 | 2 | 1 | 4 | 3 | 3 | 2 | 2 | 4 | 4 |
| Respondent 58  | 1 | 2 | 3 | 2 | 2 | 3 | 4 | 4 | 3 | 3 | 2 | 5 |
| Respondent 59  | 2 | 3 | 4 | 3 | 3 | 5 | 1 | 3 | 4 | 4 | 5 | 6 |
| Respondent 60  | 2 | 2 | 1 | 3 | 2 | 1 | 3 | 4 | 2 | 2 | 5 | 4 |
| Respondent 61  | 3 | 2 | 2 | 2 | 2 | 3 | 4 | 2 | 4 | 4 | 2 | 3 |
| Respondent 62  | 3 | 3 | 3 | 3 | 1 | 4 | 2 | 2 | 2 | 2 | 3 | 5 |
| Respondent 63  | 3 | 2 | 2 | 2 | 2 | 2 | 2 | 4 | 4 | 4 | 5 | 5 |
| Respondent 64  | 2 | 3 | 2 | 2 | 2 | 3 | 4 | 1 | 3 | 3 | 4 | 6 |
| Respondent 65  | 3 | 2 | 3 | 3 | 2 | 3 | 1 | 3 | 5 | 5 | 3 | 3 |
| Respondent 66  | 2 | 2 | 3 | 2 | 3 | 4 | 3 | 4 | 2 | 4 | 5 | 5 |
| Respondent 67  | 2 | 3 | 4 | 2 | 1 | 3 | 4 | 2 | 3 | 3 | 5 | 5 |
| Respondent 68  | 3 | 3 | 2 | 3 | 2 | 5 | 2 | 2 | 3 | 3 | 4 | 4 |
| Respondent 69  | 1 | 4 | 3 | 3 | 2 | 1 | 4 | 3 | 3 | 3 | 3 | 3 |
| Respondent 70  | 2 | 3 | 2 | 4 | 2 | 3 | 3 | 4 | 4 | 4 | 5 | 5 |
| Respondent 71  | 1 | 5 | 2 | 3 | 1 | 4 | 4 | 3 | 3 | 4 | 6 | 5 |
| Respondent 72  | 2 | 1 | 3 | 4 | 2 | 2 | 2 | 4 | 3 | 3 | 4 | 6 |
| Respondent 73  | 2 | 3 | 3 | 1 | 2 | 3 | 2 | 2 | 2 | 5 | 3 | 3 |
| Respondent 74  | 3 | 4 | 4 | 3 | 2 | 1 | 4 | 4 | 3 | 2 | 5 | 5 |
| Respondent 75  | 3 | 1 | 3 | 4 | 3 | 2 | 1 | 1 | 4 | 3 | 2 | 5 |
| Respondent 76  | 3 | 2 | 1 | 2 | 4 | 3 | 3 | 3 | 2 | 3 | 4 | 4 |
| Respondent 77  | 1 | 2 | 2 | 2 | 1 | 4 | 4 | 4 | 4 | 3 | 3 | 5 |
| Respondent 78  | 1 | 2 | 3 | 4 | 3 | 1 | 2 | 2 | 2 | 4 | 5 | 6 |
| Respondent 79  | 1 | 3 | 4 | 1 | 2 | 3 | 2 | 2 | 4 | 3 | 5 | 3 |
| Respondent 80  | 2 | 4 | 1 | 3 | 2 | 3 | 4 | 3 | 3 | 5 | 4 | 5 |
| Respondent 81  | 3 | 1 | 2 | 4 | 1 | 4 | 1 | 4 | 5 | 2 | 1 | 5 |
| Respondent 82  | 4 | 2 | 2 | 2 | 2 | 3 | 3 | 1 | 4 | 3 | 2 | 4 |
| Respondent 83  | 1 | 3 | 2 | 2 | 2 | 5 | 4 | 3 | 3 | 4 | 6 | 3 |
| Respondent 84  | 1 | 2 | 3 | 4 | 2 | 1 | 1 | 4 | 3 | 2 | 4 | 5 |
| Respondent 85  | 5 | 2 | 4 | 2 | 3 | 3 | 3 | 2 | 3 | 4 | 3 | 3 |
| Respondent 86  | 1 | 3 | 2 | 2 | 3 | 4 | 4 | 2 | 4 | 2 | 5 | 5 |
| Respondent 87  | 2 | 3 | 3 | 3 | 2 | 2 | 2 | 2 | 3 | 4 | 3 | 5 |
| Respondent 88  | 1 | 4 | 2 | 3 | 2 | 3 | 2 | 3 | 5 | 3 | 4 | 6 |
| Respondent 89  | 2 | 3 | 2 | 4 | 1 | 3 | 4 | 4 | 2 | 5 | 2 | 3 |
| Respondent 90  | 3 | 4 | 3 | 3 | 2 | 4 | 1 | 1 | 3 | 4 | 4 | 5 |
| Respondent 91  | 2 | 1 | 3 | 4 | 2 | 3 | 3 | 3 | 4 | 3 | 3 | 5 |
| Respondent 92  | 2 | 3 | 4 | 2 | 2 | 5 | 4 | 3 | 2 | 3 | 2 | 4 |
| Respondent 93  | 3 | 4 | 3 | 2 | 3 | 1 | 2 | 4 | 4 | 3 | 3 | 3 |
| Respondent 94  | 1 | 2 | 1 | 4 | 3 | 3 | 4 | 2 | 2 | 4 | 5 | 5 |
| Respondent 95  | 2 | 2 | 2 | 1 | 2 | 4 | 3 | 2 | 1 | 4 | 4 | 5 |
| Respondent 96  | 1 | 1 | 3 | 3 | 2 | 2 | 4 | 4 | 3 | 3 | 3 | 6 |
| Respondent 97  | 2 | 2 | 4 | 4 | 1 | 3 | 2 | 1 | 4 | 2 | 5 | 3 |
| Respondent 98  | 2 | 3 | 1 | 1 | 2 | 1 | 2 | 2 | 2 | 2 | 5 | 5 |
| Respondent 99  | 3 | 4 | 2 | 3 | 2 | 2 | 4 | 4 | 4 | 4 | 4 | 5 |
| Respondent 100 | 3 | 1 | 2 | 4 | 2 | 3 | 1 | 1 | 3 | 1 | 3 | 4 |

|                |   |   |   |   |   |   |   |   |   |   |   |   |
|----------------|---|---|---|---|---|---|---|---|---|---|---|---|
| Respondent 101 | 3 | 2 | 2 | 2 | 3 | 4 | 3 | 3 | 4 | 3 | 5 | 5 |
| Respondent 102 | 1 | 3 | 3 | 2 | 3 | 1 | 4 | 4 | 2 | 4 | 6 | 6 |
| Respondent 103 | 1 | 2 | 4 | 4 | 2 | 3 | 2 | 2 | 2 | 2 | 4 | 4 |
| Respondent 104 | 1 | 2 | 2 | 1 | 2 | 3 | 2 | 2 | 4 | 2 | 3 | 3 |
| Respondent 105 | 2 | 3 | 3 | 3 | 1 | 4 | 3 | 3 | 1 | 4 | 5 | 5 |
| Respondent 106 | 3 | 3 | 2 | 4 | 2 | 3 | 4 | 4 | 3 | 1 | 2 | 5 |
| Respondent 107 | 4 | 4 | 2 | 2 | 2 | 5 | 1 | 1 | 4 | 3 | 4 | 6 |
| Respondent 108 | 1 | 3 | 3 | 4 | 2 | 1 | 3 | 3 | 2 | 4 | 3 | 3 |
| Respondent 109 | 1 | 1 | 3 | 1 | 3 | 3 | 4 | 4 | 2 | 1 | 5 | 5 |
| Respondent 110 | 5 | 1 | 4 | 3 | 3 | 4 | 2 | 2 | 4 | 3 | 5 | 5 |
| Respondent 111 | 1 | 2 | 3 | 4 | 2 | 4 | 2 | 2 | 1 | 2 | 4 | 4 |
| Respondent 112 | 2 | 3 | 1 | 2 | 3 | 2 | 4 | 2 | 3 | 4 | 1 | 3 |
| Respondent 113 | 1 | 2 | 2 | 4 | 2 | 3 | 1 | 3 | 4 | 1 | 2 | 5 |
| Respondent 114 | 2 | 2 | 3 | 2 | 2 | 3 | 3 | 4 | 1 | 2 | 6 | 5 |
| Respondent 115 | 3 | 3 | 4 | 2 | 1 | 4 | 4 | 1 | 3 | 4 | 4 | 6 |
| Respondent 116 | 2 | 3 | 1 | 4 | 2 | 3 | 2 | 3 | 3 | 3 | 3 | 3 |
| Respondent 117 | 2 | 4 | 2 | 1 | 2 | 5 | 4 | 3 | 2 | 3 | 5 | 5 |
| Respondent 118 | 3 | 3 | 2 | 3 | 2 | 1 | 3 | 4 | 3 | 3 | 3 | 5 |
| Respondent 119 | 1 | 5 | 2 | 4 | 3 | 3 | 4 | 2 | 4 | 4 | 4 | 4 |
| Respondent 120 | 2 | 1 | 3 | 1 | 3 | 4 | 2 | 2 | 2 | 3 | 2 | 5 |
| Respondent 121 | 1 | 3 | 4 | 3 | 2 | 2 | 2 | 4 | 4 | 5 | 5 | 6 |
| Respondent 122 | 2 | 4 | 2 | 4 | 2 | 3 | 4 | 1 | 2 | 2 | 5 | 5 |
| Respondent 123 | 2 | 1 | 3 | 2 | 1 | 1 | 1 | 2 | 4 | 3 | 2 | 6 |
| Respondent 124 | 3 | 2 | 2 | 2 | 2 | 2 | 3 | 4 | 3 | 4 | 3 | 3 |
| Respondent 125 | 3 | 1 | 2 | 4 | 2 | 3 | 4 | 1 | 5 | 2 | 5 | 5 |
| Respondent 126 | 3 | 2 | 3 | 1 | 2 | 4 | 2 | 3 | 4 | 4 | 4 | 5 |
| Respondent 127 | 1 | 3 | 3 | 3 | 3 | 1 | 2 | 4 | 3 | 2 | 3 | 4 |
| Respondent 128 | 1 | 4 | 4 | 4 | 3 | 3 | 3 | 2 | 3 | 4 | 4 | 3 |
| Respondent 129 | 1 | 1 | 3 | 2 | 2 | 3 | 4 | 2 | 3 | 3 | 5 | 5 |
| Respondent 130 | 2 | 2 | 1 | 4 | 2 | 4 | 1 | 3 | 4 | 5 | 4 | 5 |
| Respondent 131 | 3 | 3 | 2 | 1 | 1 | 3 | 3 | 4 | 3 | 2 | 3 | 6 |
| Respondent 132 | 4 | 2 | 3 | 3 | 2 | 5 | 4 | 1 | 5 | 2 | 5 | 5 |
| Respondent 133 | 1 | 2 | 4 | 4 | 2 | 1 | 2 | 3 | 2 | 4 | 6 | 6 |
| Respondent 134 | 1 | 3 | 1 | 2 | 2 | 3 | 2 | 4 | 3 | 1 | 4 | 3 |
| Respondent 135 | 5 | 3 | 2 | 4 | 3 | 4 | 4 | 2 | 4 | 3 | 3 | 5 |
| Respondent 136 | 1 | 4 | 2 | 2 | 3 | 2 | 1 | 2 | 2 | 4 | 5 | 5 |
| Respondent 137 | 2 | 3 | 2 | 2 | 3 | 4 | 3 | 2 | 4 | 2 | 2 | 4 |
| Respondent 138 | 1 | 5 | 3 | 4 | 2 | 2 | 4 | 3 | 2 | 2 | 4 | 3 |
| Respondent 139 | 2 | 1 | 4 | 1 | 2 | 3 | 2 | 4 | 1 | 4 | 3 | 5 |
| Respondent 140 | 3 | 3 | 2 | 3 | 1 | 3 | 4 | 1 | 3 | 1 | 5 | 5 |
| Respondent 141 | 2 | 4 | 3 | 4 | 2 | 4 | 3 | 3 | 4 | 3 | 5 | 6 |
| Respondent 142 | 2 | 1 | 2 | 1 | 2 | 3 | 4 | 3 | 2 | 4 | 4 | 5 |
| Respondent 143 | 3 | 2 | 2 | 3 | 2 | 5 | 2 | 4 | 4 | 1 | 1 | 6 |
| Respondent 144 | 1 | 2 | 3 | 4 | 3 | 1 | 2 | 2 | 3 | 3 | 2 | 3 |
| Respondent 145 | 2 | 2 | 3 | 2 | 3 | 3 | 4 | 2 | 3 | 2 | 6 | 5 |
| Respondent 146 | 1 | 3 | 4 | 2 | 2 | 4 | 1 | 4 | 2 | 4 | 4 | 5 |
| Respondent 147 | 2 | 4 | 3 | 4 | 2 | 2 | 3 | 1 | 3 | 1 | 3 | 4 |
| Respondent 148 | 2 | 1 | 1 | 1 | 1 | 3 | 4 | 2 | 4 | 2 | 5 | 5 |
| Respondent 149 | 3 | 2 | 2 | 3 | 2 | 1 | 2 | 4 | 2 | 4 | 3 | 6 |
| Respondent 150 | 3 | 3 | 3 | 4 | 2 | 2 | 2 | 1 | 4 | 3 | 4 | 4 |
| Respondent 151 | 3 | 2 | 4 | 2 | 2 | 3 | 3 | 3 | 2 | 3 | 2 | 3 |
| Respondent 152 | 1 | 2 | 1 | 4 | 3 | 4 | 4 | 4 | 4 | 3 | 5 | 5 |
| Respondent 153 | 1 | 3 | 2 | 1 | 3 | 1 | 1 | 2 | 3 | 4 | 5 | 5 |
| Respondent 154 | 1 | 3 | 2 | 3 | 2 | 3 | 3 | 2 | 5 | 3 | 2 | 6 |

|                |   |   |   |   |   |   |   |   |   |   |   |   |
|----------------|---|---|---|---|---|---|---|---|---|---|---|---|
| Respondent 155 | 2 | 4 | 2 | 4 | 2 | 3 | 4 | 3 | 4 | 5 | 3 | 3 |
| Respondent 156 | 3 | 3 | 3 | 2 | 1 | 4 | 2 | 4 | 3 | 2 | 5 | 5 |
| Respondent 157 | 4 | 4 | 4 | 4 | 2 | 3 | 2 | 1 | 3 | 3 | 4 | 6 |
| Respondent 158 | 1 | 1 | 2 | 2 | 2 | 5 | 4 | 3 | 3 | 4 | 3 | 3 |
| Respondent 159 | 1 | 3 | 3 | 2 | 2 | 1 | 1 | 4 | 4 | 2 | 3 | 5 |
| Respondent 160 | 5 | 4 | 2 | 4 | 3 | 3 | 3 | 2 | 3 | 4 | 5 | 5 |
| Respondent 161 | 1 | 2 | 2 | 1 | 3 | 4 | 4 | 2 | 5 | 2 | 4 | 4 |
| Respondent 162 | 2 | 2 | 3 | 3 | 3 | 2 | 2 | 2 | 2 | 4 | 1 | 3 |
| Respondent 163 | 1 | 1 | 3 | 4 | 2 | 4 | 4 | 3 | 3 | 3 | 2 | 5 |
| Respondent 164 | 2 | 2 | 4 | 1 | 2 | 2 | 3 | 4 | 4 | 5 | 6 | 3 |
| Respondent 165 | 3 | 3 | 3 | 3 | 1 | 3 | 4 | 1 | 2 | 2 | 4 | 5 |
| Respondent 166 | 2 | 4 | 1 | 4 | 2 | 3 | 2 | 3 | 4 | 2 | 3 | 5 |
| Respondent 167 | 2 | 1 | 2 | 2 | 2 | 4 | 2 | 3 | 2 | 4 | 5 | 6 |
| Respondent 168 | 3 | 2 | 3 | 2 | 2 | 3 | 4 | 4 | 1 | 1 | 3 | 3 |
| Respondent 169 | 1 | 3 | 4 | 4 | 3 | 5 | 1 | 2 | 3 | 3 | 4 | 5 |
| Respondent 170 | 2 | 2 | 1 | 1 | 3 | 1 | 3 | 2 | 4 | 4 | 2 | 5 |
| Respondent 171 | 1 | 2 | 2 | 3 | 2 | 3 | 4 | 4 | 2 | 2 | 5 | 4 |
| Respondent 172 | 2 | 3 | 2 | 4 | 2 | 4 | 2 | 1 | 4 | 2 | 5 | 3 |
| Respondent 173 | 2 | 3 | 2 | 2 | 1 | 2 | 2 | 2 | 3 | 4 | 2 | 5 |
| Respondent 174 | 3 | 4 | 3 | 4 | 2 | 3 | 3 | 4 | 3 | 1 | 3 | 5 |
| Respondent 175 | 3 | 3 | 4 | 1 | 2 | 1 | 4 | 1 | 2 | 3 | 5 | 3 |
| Respondent 176 | 3 | 1 | 2 | 3 | 2 | 2 | 1 | 3 | 3 | 4 | 4 | 4 |
| Respondent 177 | 1 | 2 | 3 | 4 | 3 | 3 | 3 | 4 | 4 | 1 | 3 | 2 |
| Respondent 178 | 1 | 3 | 2 | 2 | 3 | 4 | 4 | 2 | 2 | 3 | 5 | 4 |
| Respondent 179 | 1 | 4 | 2 | 4 | 2 | 1 | 2 | 2 | 4 | 2 | 5 | 3 |
| Respondent 180 | 2 | 1 | 3 | 2 | 2 | 3 | 2 | 3 | 2 | 4 | 4 | 3 |
| Respondent 181 | 3 | 2 | 3 | 2 | 1 | 3 | 4 | 4 | 4 | 1 | 3 | 2 |
| Respondent 182 | 1 | 2 | 4 | 4 | 2 | 4 | 1 | 1 | 3 | 2 | 5 | 3 |
| Respondent 183 | 2 | 2 | 3 | 1 | 2 | 3 | 3 | 3 | 5 | 4 | 6 | 4 |
| Respondent 184 | 1 | 3 | 1 | 3 | 2 | 5 | 4 | 4 | 4 | 3 | 4 | 2 |
| Respondent 185 | 3 | 4 | 2 | 4 | 3 | 1 | 4 | 2 | 3 | 3 | 3 | 4 |
| Respondent 186 | 1 | 3 | 3 | 1 | 3 | 3 | 1 | 2 | 3 | 3 | 5 | 2 |
| Respondent 187 | 2 | 2 | 4 | 3 | 3 | 4 | 3 | 1 | 3 | 4 | 2 | 4 |
| Respondent 188 | 1 | 3 | 1 | 4 | 2 | 2 | 4 | 3 | 4 | 3 | 4 | 3 |
| Respondent 189 | 2 | 2 | 2 | 2 | 2 | 4 | 2 | 3 | 3 | 5 | 3 | 5 |
| Respondent 190 | 3 | 2 | 2 | 2 | 1 | 2 | 4 | 4 | 5 | 2 | 5 | 4 |
| Respondent 191 | 2 | 3 | 2 | 4 | 2 | 3 | 3 | 2 | 2 | 3 | 4 | 3 |
| Respondent 192 | 2 | 3 | 3 | 1 | 2 | 3 | 4 | 2 | 3 | 4 | 1 | 4 |
| Respondent 193 | 3 | 4 | 4 | 3 | 2 | 4 | 2 | 4 | 4 | 2 | 2 | 5 |
| Respondent 194 | 1 | 3 | 2 | 4 | 1 | 3 | 2 | 1 | 2 | 4 | 6 | 4 |
| Respondent 195 | 2 | 5 | 3 | 2 | 2 | 5 | 4 | 2 | 4 | 2 | 4 | 3 |
| Respondent 196 | 1 | 2 | 2 | 4 | 2 | 1 | 1 | 4 | 2 | 4 | 3 | 5 |
| Respondent 197 | 2 | 3 | 2 | 1 | 2 | 3 | 3 | 1 | 1 | 3 | 5 | 5 |
| Respondent 198 | 2 | 4 | 3 | 3 | 3 | 4 | 4 | 3 | 3 | 4 | 3 | 6 |
| Respondent 199 | 3 | 1 | 3 | 4 | 4 | 2 | 2 | 4 | 4 | 3 | 4 | 3 |
| Respondent 200 | 3 | 2 | 4 | 2 | 1 | 3 | 2 | 2 | 2 | 5 | 2 | 5 |
| Respondent 201 | 3 | 1 | 3 | 4 | 2 | 1 | 3 | 2 | 4 | 2 | 5 | 5 |
| Respondent 202 | 1 | 2 | 1 | 2 | 3 | 2 | 4 | 3 | 2 | 3 | 5 | 4 |
| Respondent 203 | 1 | 3 | 2 | 2 | 1 | 3 | 1 | 4 | 4 | 4 | 2 | 6 |
| Respondent 204 | 1 | 4 | 3 | 4 | 2 | 4 | 3 | 1 | 2 | 2 | 3 | 3 |
| Respondent 205 | 2 | 1 | 4 | 1 | 2 | 1 | 4 | 3 | 4 | 4 | 5 | 2 |
| Respondent 206 | 3 | 2 | 1 | 3 | 2 | 2 | 2 | 4 | 3 | 2 | 4 | 3 |
| Respondent 207 | 4 | 3 | 2 | 4 | 3 | 3 | 2 | 2 | 5 | 4 | 3 | 4 |
| Respondent 208 | 1 | 2 | 2 | 1 | 4 | 1 | 4 | 2 | 4 | 3 | 5 | 2 |

|                |   |   |   |   |   |   |   |   |   |   |   |   |
|----------------|---|---|---|---|---|---|---|---|---|---|---|---|
| Respondent 209 | 1 | 2 | 2 | 3 | 1 | 2 | 1 | 2 | 3 | 5 | 5 | 4 |
| Respondent 210 | 5 | 3 | 3 | 4 | 2 | 1 | 3 | 3 | 3 | 4 | 4 | 2 |
| Respondent 211 | 1 | 3 | 4 | 2 | 3 | 3 | 4 | 4 | 3 | 3 | 3 | 3 |
| Respondent 212 | 2 | 4 | 4 | 2 | 1 | 1 | 4 | 1 | 4 | 3 | 5 | 3 |
| Respondent 213 | 1 | 3 | 2 | 4 | 2 | 2 | 1 | 3 | 3 | 3 | 5 | 4 |
| Respondent 214 | 2 | 5 | 3 | 1 | 2 | 1 | 3 | 3 | 5 | 4 | 4 | 2 |
| Respondent 215 | 3 | 1 | 2 | 3 | 2 | 2 | 4 | 4 | 2 | 4 | 3 | 2 |
| Respondent 216 | 2 | 3 | 2 | 4 | 3 | 4 | 2 | 2 | 3 | 3 | 5 | 3 |
| Respondent 217 | 2 | 4 | 3 | 2 | 4 | 3 | 4 | 2 | 4 | 2 | 2 | 4 |
| Respondent 218 | 3 | 1 | 3 | 4 | 2 | 5 | 3 | 3 | 2 | 2 | 4 | 2 |
| Respondent 219 | 1 | 2 | 4 | 4 | 2 | 1 | 4 | 4 | 4 | 4 | 3 | 4 |
| Respondent 220 | 2 | 1 | 3 | 1 | 3 | 3 | 2 | 1 | 2 | 1 | 3 | 3 |
| Respondent 221 | 1 | 2 | 1 | 3 | 3 | 4 | 2 | 3 | 1 | 3 | 3 | 4 |
| Respondent 222 | 2 | 3 | 2 | 4 | 3 | 2 | 4 | 4 | 3 | 4 | 4 | 2 |
| Respondent 223 | 2 | 4 | 3 | 2 | 2 | 4 | 1 | 2 | 4 | 2 | 3 | 4 |
| Respondent 224 | 3 | 1 | 4 | 4 | 2 | 3 | 3 | 2 | 2 | 2 | 2 | 3 |
| Respondent 225 | 3 | 2 | 1 | 1 | 1 | 2 | 4 | 1 | 4 | 4 | 2 | 3 |
| Respondent 226 | 3 | 3 | 2 | 3 | 2 | 1 | 2 | 3 | 3 | 1 | 3 | 2 |
| Respondent 227 | 1 | 2 | 2 | 4 | 2 | 3 | 2 | 3 | 4 | 3 | 4 | 3 |
| Respondent 228 | 1 | 2 | 2 | 2 | 2 | 1 | 3 | 4 | 2 | 4 | 2 | 4 |
| Respondent 229 | 1 | 3 | 3 | 4 | 1 | 2 | 4 | 2 | 2 | 3 | 4 | 2 |
| Respondent 230 | 2 | 3 | 4 | 2 | 2 | 1 | 1 | 2 | 4 | 5 | 2 | 4 |
| Respondent 231 | 3 | 4 | 4 | 2 | 2 | 4 | 3 | 4 | 1 | 2 | 4 | 2 |
| Respondent 232 | 4 | 3 | 2 | 4 | 2 | 3 | 4 | 1 | 3 | 3 | 3 | 4 |
| Respondent 233 | 1 | 5 | 3 | 1 | 3 | 5 | 2 | 2 | 4 | 4 | 4 | 3 |
| Respondent 234 | 4 | 1 | 2 | 3 | 4 | 1 | 2 | 4 | 2 | 2 | 3 | 5 |
| Respondent 235 | 1 | 3 | 2 | 4 | 1 | 3 | 4 | 1 | 2 | 4 | 5 | 6 |
| Respondent 236 | 1 | 4 | 3 | 1 | 2 | 4 | 1 | 3 | 4 | 2 | 2 | 3 |
| Respondent 237 | 2 | 1 | 3 | 3 | 3 | 2 | 3 | 4 | 1 | 4 | 3 | 5 |
| Respondent 238 | 1 | 2 | 4 | 4 | 1 | 3 | 4 | 2 | 3 | 3 | 4 | 5 |
| Respondent 239 | 2 | 1 | 3 | 2 | 2 | 1 | 4 | 2 | 4 | 5 | 2 | 4 |
| Respondent 240 | 3 | 2 | 1 | 2 | 2 | 2 | 1 | 3 | 1 | 4 | 4 | 3 |
| Respondent 241 | 2 | 3 | 2 | 4 | 2 | 3 | 3 | 4 | 3 | 3 | 2 | 5 |
| Respondent 242 | 2 | 4 | 3 | 1 | 3 | 4 | 4 | 1 | 3 | 3 | 3 | 5 |
| Respondent 243 | 3 | 1 | 4 | 3 | 2 | 1 | 2 | 3 | 2 | 3 | 3 | 3 |
| Respondent 244 | 1 | 2 | 1 | 4 | 2 | 3 | 4 | 4 | 3 | 4 | 4 | 4 |
| Respondent 245 | 2 | 3 | 2 | 4 | 3 | 3 | 3 | 2 | 4 | 4 | 3 | 2 |
| Respondent 246 | 1 | 2 | 2 | 1 | 3 | 4 | 4 | 2 | 2 | 3 | 5 | 4 |
| Respondent 247 | 2 | 2 | 2 | 3 | 3 | 3 | 2 | 2 | 4 | 2 | 2 | 3 |
| Respondent 248 | 2 | 3 | 3 | 4 | 2 | 5 | 2 | 3 | 2 | 2 | 3 | 3 |
| Respondent 249 | 3 | 3 | 4 | 2 | 2 | 1 | 4 | 4 | 4 | 4 | 4 | 2 |
| Respondent 250 | 3 | 4 | 4 | 4 | 1 | 3 | 1 | 3 | 2 | 1 | 2 | 3 |
| Respondent 251 | 3 | 3 | 2 | 1 | 2 | 4 | 3 | 4 | 4 | 3 | 4 | 4 |
| Respondent 252 | 1 | 5 | 3 | 3 | 2 | 2 | 4 | 1 | 3 | 4 | 2 | 2 |
| Respondent 253 | 1 | 1 | 2 | 4 | 2 | 4 | 2 | 3 | 5 | 2 | 4 | 4 |
| Respondent 254 | 1 | 3 | 2 | 2 | 1 | 2 | 2 | 4 | 4 | 2 | 3 | 2 |
| Respondent 255 | 2 | 4 | 3 | 4 | 2 | 4 | 3 | 2 | 3 | 4 | 4 | 4 |
| Respondent 256 | 3 | 1 | 3 | 2 | 2 | 3 | 4 | 2 | 3 | 1 | 3 | 3 |
| Respondent 257 | 4 | 2 | 4 | 2 | 2 | 5 | 1 | 1 | 3 | 3 | 5 | 5 |
| Respondent 258 | 1 | 2 | 3 | 4 | 3 | 1 | 3 | 3 | 4 | 4 | 2 | 6 |
| Respondent 259 | 1 | 2 | 1 | 1 | 4 | 3 | 4 | 3 | 3 | 3 | 3 | 3 |
| Respondent 260 | 5 | 3 | 2 | 3 | 1 | 4 | 2 | 4 | 5 | 5 | 4 | 5 |
| Respondent 261 | 1 | 4 | 3 | 4 | 2 | 2 | 2 | 2 | 2 | 2 | 2 | 5 |
| Respondent 262 | 2 | 1 | 4 | 1 | 3 | 3 | 4 | 2 | 3 | 3 | 4 | 4 |

|                |   |   |   |   |   |   |   |   |   |   |   |   |
|----------------|---|---|---|---|---|---|---|---|---|---|---|---|
| Respondent 263 | 1 | 2 | 1 | 3 | 1 | 1 | 1 | 4 | 4 | 4 | 2 | 3 |
| Respondent 264 | 2 | 3 | 2 | 4 | 2 | 2 | 3 | 1 | 2 | 2 | 3 | 5 |
| Respondent 265 | 3 | 2 | 2 | 2 | 2 | 3 | 4 | 2 | 4 | 4 | 3 | 5 |
| Respondent 266 | 2 | 2 | 2 | 2 | 2 | 4 | 4 | 4 | 2 | 2 | 4 | 3 |
| Respondent 267 | 2 | 3 | 3 | 4 | 3 | 1 | 1 | 1 | 1 | 4 | 3 | 4 |
| Respondent 268 | 3 | 3 | 4 | 1 | 2 | 3 | 3 | 3 | 3 | 3 | 5 | 5 |
| Respondent 269 | 1 | 4 | 2 | 3 | 2 | 3 | 4 | 4 | 4 | 5 | 2 | 4 |
| Respondent 270 | 2 | 3 | 3 | 4 | 3 | 4 | 2 | 2 | 2 | 4 | 3 | 3 |
| Respondent 271 | 1 | 5 | 2 | 4 | 3 | 3 | 4 | 2 | 4 | 4 | 4 | 5 |
| Respondent 272 | 2 | 1 | 2 | 1 | 3 | 5 | 3 | 3 | 3 | 3 | 2 | 5 |
| Respondent 273 | 2 | 3 | 3 | 3 | 2 | 1 | 4 | 4 | 4 | 3 | 4 | 6 |
| Respondent 274 | 3 | 4 | 3 | 4 | 2 | 3 | 2 | 1 | 2 | 3 | 2 | 5 |
| Respondent 275 | 3 | 1 | 4 | 2 | 1 | 4 | 2 | 3 | 2 | 4 | 4 | 6 |
| Respondent 276 | 3 | 2 | 3 | 4 | 2 | 2 | 4 | 4 | 4 | 3 | 3 | 2 |
| Respondent 277 | 1 | 3 | 1 | 1 | 2 | 4 | 1 | 2 | 1 | 5 | 4 | 2 |
| Respondent 278 | 1 | 2 | 2 | 3 | 2 | 2 | 3 | 2 | 3 | 2 | 3 | 3 |
| Respondent 279 | 1 | 3 | 3 | 4 | 1 | 4 | 4 | 2 | 4 | 3 | 5 | 4 |
| Respondent 280 | 2 | 4 | 4 | 2 | 2 | 3 | 2 | 3 | 2 | 4 | 2 | 1 |
| Respondent 281 | 3 | 1 | 1 | 4 | 2 | 5 | 2 | 4 | 2 | 2 | 3 | 2 |
| Respondent 282 | 4 | 2 | 2 | 2 | 2 | 1 | 3 | 3 | 4 | 4 | 4 | 3 |
| Respondent 283 | 1 | 3 | 2 | 2 | 3 | 3 | 4 | 4 | 1 | 2 | 2 | 1 |
| Respondent 284 | 1 | 2 | 2 | 4 | 4 | 4 | 1 | 1 | 3 | 4 | 4 | 2 |
| Respondent 285 | 5 | 2 | 3 | 1 | 1 | 2 | 3 | 3 | 4 | 3 | 2 | 2 |
| Respondent 286 | 1 | 3 | 2 | 3 | 2 | 3 | 4 | 4 | 1 | 4 | 3 | 2 |
| Respondent 287 | 2 | 3 | 3 | 4 | 3 | 1 | 2 | 2 | 3 | 3 | 3 | 3 |
| Respondent 288 | 1 | 4 | 4 | 1 | 1 | 2 | 2 | 2 | 3 | 5 | 4 | 2 |
| Respondent 289 | 2 | 3 | 2 | 3 | 2 | 3 | 4 | 1 | 2 | 2 | 2 | 2 |
| Respondent 290 | 3 | 3 | 3 | 4 | 2 | 4 | 1 | 3 | 4 | 3 | 4 | 3 |
| Respondent 291 | 2 | 1 | 2 | 2 | 2 | 1 | 3 | 3 | 1 | 4 | 3 | 3 |
| Respondent 292 | 2 | 3 | 2 | 2 | 3 | 3 | 4 | 4 | 3 | 2 | 5 | 3 |
| Respondent 293 | 3 | 4 | 3 | 4 | 2 | 3 | 4 | 2 | 4 | 4 | 3 | 4 |
| Respondent 294 | 1 | 1 | 3 | 1 | 2 | 4 | 1 | 2 | 2 | 2 | 4 | 3 |
| Respondent 295 | 2 | 2 | 4 | 3 | 3 | 3 | 3 | 4 | 2 | 4 | 2 | 5 |
| Respondent 296 | 1 | 1 | 3 | 4 | 3 | 5 | 4 | 1 | 3 | 3 | 5 | 5 |
| Respondent 297 | 2 | 2 | 1 | 4 | 3 | 1 | 2 | 2 | 4 | 5 | 5 | 6 |
| Respondent 298 | 2 | 3 | 2 | 1 | 2 | 3 | 4 | 4 | 1 | 4 | 2 | 5 |
| Respondent 299 | 3 | 1 | 3 | 3 | 2 | 4 | 3 | 1 | 3 | 4 | 3 | 6 |
| Respondent 300 | 3 | 1 | 4 | 4 | 1 | 2 | 4 | 3 | 4 | 3 | 2 | 3 |
| Respondent 301 | 3 | 2 | 1 | 2 | 2 | 4 | 2 | 4 | 2 | 3 | 4 | 5 |
| Respondent 302 | 1 | 3 | 2 | 4 | 2 | 2 | 2 | 2 | 2 | 3 | 3 | 5 |
| Respondent 303 | 1 | 2 | 2 | 1 | 2 | 4 | 4 | 2 | 2 | 4 | 2 | 4 |
| Respondent 304 | 1 | 2 | 2 | 3 | 1 | 3 | 1 | 3 | 3 | 3 | 5 | 3 |
| Respondent 305 | 2 | 3 | 3 | 4 | 2 | 5 | 3 | 4 | 4 | 5 | 4 | 5 |
| Respondent 306 | 3 | 3 | 2 | 2 | 2 | 1 | 4 | 1 | 3 | 2 | 3 | 5 |
| Respondent 307 | 4 | 4 | 3 | 4 | 2 | 3 | 2 | 3 | 4 | 3 | 5 | 6 |
| Respondent 308 | 1 | 3 | 4 | 2 | 3 | 4 | 2 | 4 | 1 | 4 | 6 | 5 |
| Respondent 309 | 1 | 3 | 2 | 2 | 4 | 2 | 3 | 2 | 3 | 2 | 4 | 6 |
| Respondent 310 | 5 | 1 | 3 | 4 | 1 | 3 | 4 | 2 | 2 | 4 | 3 | 3 |
| Respondent 311 | 1 | 3 | 2 | 1 | 2 | 1 | 1 | 2 | 4 | 2 | 2 | 5 |
| Respondent 312 | 2 | 4 | 2 | 3 | 3 | 2 | 3 | 3 | 1 | 4 | 6 | 5 |
| Respondent 313 | 1 | 1 | 3 | 4 | 1 | 3 | 4 | 4 | 3 | 3 | 4 | 4 |
| Respondent 314 | 2 | 2 | 3 | 1 | 2 | 4 | 2 | 3 | 4 | 4 | 3 | 5 |
| Respondent 315 | 3 | 1 | 4 | 3 | 2 | 1 | 2 | 4 | 2 | 3 | 5 | 6 |
| Respondent 316 | 2 | 2 | 3 | 4 | 2 | 3 | 4 | 1 | 2 | 5 | 3 | 5 |

|                |   |   |   |   |   |   |   |   |   |   |   |   |
|----------------|---|---|---|---|---|---|---|---|---|---|---|---|
| Respondent 317 | 2 | 3 | 1 | 2 | 3 | 3 | 1 | 3 | 3 | 2 | 4 | 4 |
| Respondent 318 | 3 | 4 | 2 | 2 | 2 | 4 | 3 | 4 | 4 | 3 | 2 | 3 |
| Respondent 319 | 1 | 1 | 3 | 4 | 2 | 3 | 4 | 2 | 1 | 4 | 5 | 5 |
| Respondent 320 | 2 | 2 | 4 | 1 | 3 | 5 | 4 | 2 | 3 | 2 | 5 | 4 |
| Respondent 321 | 1 | 3 | 1 | 3 | 3 | 1 | 1 | 1 | 4 | 4 | 2 | 3 |
| Respondent 322 | 2 | 2 | 2 | 4 | 3 | 3 | 3 | 3 | 2 | 2 | 3 | 5 |
| Respondent 323 | 2 | 2 | 2 | 4 | 2 | 4 | 4 | 3 | 2 | 4 | 5 | 3 |
| Respondent 324 | 3 | 3 | 2 | 1 | 2 | 2 | 2 | 4 | 2 | 3 | 4 | 4 |
| Respondent 325 | 3 | 3 | 3 | 3 | 1 | 4 | 4 | 2 | 3 | 5 | 3 | 2 |
| Respondent 326 | 3 | 1 | 2 | 4 | 2 | 2 | 3 | 2 | 4 | 4 | 5 | 5 |
| Respondent 327 | 1 | 3 | 3 | 2 | 2 | 4 | 4 | 4 | 3 | 4 | 5 | 5 |
| Respondent 328 | 1 | 5 | 4 | 4 | 2 | 3 | 2 | 1 | 4 | 3 | 4 | 2 |
| Respondent 329 | 1 | 1 | 2 | 1 | 1 | 5 | 2 | 2 | 1 | 3 | 3 | 3 |
| Respondent 330 | 2 | 3 | 3 | 3 | 2 | 1 | 4 | 4 | 3 | 3 | 5 | 2 |
| Respondent 331 | 3 | 4 | 2 | 3 | 2 | 3 | 1 | 1 | 2 | 4 | 6 | 4 |
| Respondent 332 | 4 | 1 | 2 | 4 | 2 | 4 | 3 | 3 | 4 | 3 | 4 | 3 |
| Respondent 333 | 1 | 2 | 3 | 4 | 3 | 2 | 4 | 4 | 1 | 5 | 3 | 2 |
| Respondent 334 | 1 | 2 | 3 | 1 | 4 | 3 | 2 | 2 | 3 | 2 | 5 | 5 |
| Respondent 335 | 5 | 2 | 4 | 3 | 1 | 1 | 2 | 2 | 4 | 3 | 6 | 4 |
| Respondent 336 | 1 | 3 | 3 | 4 | 2 | 2 | 3 | 3 | 2 | 4 | 4 | 3 |
| Respondent 337 | 2 | 4 | 1 | 2 | 3 | 1 | 4 | 4 | 2 | 2 | 3 | 5 |
| Respondent 338 | 1 | 2 | 2 | 4 | 1 | 3 | 1 | 1 | 3 | 4 | 5 | 6 |
| Respondent 339 | 2 | 2 | 3 | 1 | 2 | 1 | 3 | 3 | 4 | 2 | 3 | 4 |
| Respondent 340 | 3 | 3 | 4 | 3 | 2 | 2 | 4 | 4 | 1 | 4 | 4 | 3 |
| Respondent 341 | 2 | 2 | 1 | 4 | 2 | 1 | 2 | 3 | 3 | 3 | 2 | 2 |
| Respondent 342 | 2 | 2 | 2 | 2 | 3 | 2 | 2 | 4 | 4 | 4 | 5 | 6 |
| Respondent 343 | 3 | 2 | 2 | 4 | 2 | 4 | 4 | 2 | 2 | 3 | 5 | 4 |
| Respondent 344 | 1 | 3 | 2 | 2 | 2 | 3 | 1 | 2 | 2 | 5 | 2 | 4 |
| Respondent 345 | 2 | 3 | 3 | 2 | 3 | 5 | 3 | 4 | 2 | 2 | 3 | 3 |
| Respondent 346 | 1 | 3 | 2 | 4 | 3 | 1 | 4 | 1 | 3 | 3 | 5 | 5 |
| Respondent 347 | 2 | 5 | 3 | 1 | 3 | 3 | 4 | 2 | 4 | 4 | 4 | 3 |
| Respondent 348 | 2 | 1 | 4 | 3 | 2 | 4 | 1 | 4 | 3 | 2 | 3 | 4 |
| Respondent 349 | 3 | 3 | 2 | 4 | 2 | 2 | 3 | 1 | 4 | 4 | 5 | 2 |
| Respondent 350 | 1 | 4 | 3 | 3 | 1 | 4 | 4 | 3 | 1 | 2 | 5 | 5 |
| Respondent 351 | 3 | 1 | 2 | 4 | 2 | 3 | 2 | 4 | 3 | 4 | 4 | 5 |
| Respondent 352 | 1 | 2 | 2 | 4 | 2 | 2 | 4 | 2 | 2 | 3 | 3 | 2 |
| Respondent 353 | 1 | 1 | 3 | 1 | 2 | 1 | 3 | 2 | 4 | 5 | 5 | 3 |
| Respondent 354 | 1 | 2 | 3 | 3 | 1 | 3 | 4 | 3 | 1 | 4 | 3 | 2 |
| Respondent 355 | 2 | 3 | 4 | 4 | 2 | 1 | 2 | 4 | 2 | 3 | 6 | 4 |
| Respondent 356 | 3 | 4 | 3 | 2 | 2 | 3 | 2 | 1 | 4 | 3 | 3 | 3 |
| Respondent 357 | 4 | 1 | 1 | 4 | 2 | 1 | 4 | 3 | 3 | 3 | 5 | 2 |
| Respondent 358 | 1 | 2 | 2 | 1 | 3 | 2 | 1 | 4 | 4 | 4 | 4 | 5 |
| Respondent 359 | 1 | 3 | 3 | 3 | 4 | 1 | 3 | 2 | 2 | 3 | 4 | 4 |
| Respondent 360 | 1 | 2 | 4 | 4 | 1 | 3 | 4 | 2 | 2 | 5 | 3 | 3 |
| Respondent 361 | 1 | 2 | 1 | 2 | 2 | 1 | 2 | 2 | 4 | 2 | 4 | 5 |
| Respondent 362 | 2 | 2 | 2 | 4 | 3 | 2 | 2 | 3 | 1 | 3 | 3 | 6 |
| Respondent 363 | 1 | 3 | 2 | 2 | 1 | 1 | 3 | 4 | 3 | 4 | 4 | 4 |
| Respondent 364 | 2 | 4 | 2 | 2 | 2 | 2 | 4 | 3 | 4 | 2 | 2 | 3 |
| Respondent 365 | 3 | 3 | 3 | 4 | 2 | 4 | 1 | 4 | 2 | 4 | 5 | 2 |
| Respondent 366 | 2 | 2 | 2 | 1 | 2 | 3 | 3 | 1 | 2 | 2 | 4 | 6 |
| Respondent 367 | 1 | 1 | 3 | 3 | 3 | 5 | 4 | 3 | 4 | 4 | 2 | 4 |
| Respondent 368 | 3 | 3 | 4 | 4 | 2 | 1 | 2 | 4 | 1 | 3 | 3 | 4 |
| Respondent 369 | 1 | 4 | 2 | 3 | 2 | 3 | 2 | 3 | 3 | 4 | 5 | 3 |
| Respondent 370 | 2 | 1 | 3 | 4 | 3 | 4 | 4 | 4 | 4 | 3 | 4 | 3 |

|                |   |   |   |   |   |   |   |   |   |   |   |   |
|----------------|---|---|---|---|---|---|---|---|---|---|---|---|
| Respondent 371 | 1 | 2 | 2 | 4 | 3 | 2 | 1 | 2 | 1 | 5 | 3 | 5 |
| Respondent 372 | 2 | 1 | 2 | 1 | 3 | 4 | 3 | 2 | 3 | 2 | 5 | 4 |
| Respondent 373 | 1 | 2 | 3 | 3 | 2 | 3 | 4 | 4 | 3 | 3 | 5 | 4 |
| Respondent 374 | 3 | 3 | 3 | 4 | 2 | 2 | 1 | 1 | 2 | 4 | 4 | 3 |
| Respondent 375 | 1 | 4 | 4 | 2 | 1 | 1 | 3 | 2 | 4 | 2 | 3 | 4 |
| Respondent 376 | 3 | 1 | 3 | 4 | 2 | 3 | 4 | 4 | 1 | 4 | 5 | 3 |
| Respondent 377 | 1 | 1 | 1 | 1 | 2 | 1 | 2 | 1 | 3 | 2 | 6 | 4 |
| Respondent 378 | 1 | 3 | 2 | 3 | 2 | 3 | 4 | 3 | 4 | 4 | 4 | 2 |
| Respondent 379 | 1 | 2 | 3 | 4 | 3 | 1 | 3 | 4 | 2 | 3 | 2 | 5 |
| Respondent 380 | 2 | 2 | 4 | 2 | 4 | 2 | 4 | 2 | 2 | 3 | 3 | 4 |
| Respondent 381 | 1 | 3 | 1 | 4 | 1 | 1 | 2 | 2 | 3 | 3 | 6 | 2 |
| Respondent 382 | 4 | 3 | 2 | 2 | 2 | 3 | 2 | 3 | 4 | 4 | 4 | 3 |
| Respondent 383 | 1 | 4 | 2 | 2 | 3 | 1 | 4 | 4 | 1 | 3 | 3 | 5 |
| Respondent 384 | 1 | 3 | 2 | 4 | 1 | 2 | 1 | 1 | 3 | 5 | 5 | 4 |
| Respondent 385 | 4 | 2 | 3 | 1 | 2 | 1 | 3 | 3 | 4 | 2 | 3 | 3 |
| Respondent 386 | 1 | 1 | 2 | 3 | 2 | 2 | 4 | 4 | 2 | 3 | 4 | 5 |
| Respondent 387 | 2 | 3 | 2 | 4 | 2 | 4 | 2 | 2 | 2 | 4 | 2 | 2 |
| Respondent 388 | 1 | 4 | 3 | 3 | 3 | 3 | 2 | 2 | 2 | 2 | 5 | 2 |
| Respondent 389 | 2 | 1 | 2 | 4 | 2 | 3 | 3 | 2 | 4 | 4 | 6 | 3 |
| Respondent 390 | 3 | 2 | 2 | 4 | 2 | 3 | 4 | 3 | 3 | 2 | 2 | 4 |
| Respondent 391 | 2 | 1 | 3 | 1 | 1 | 4 | 1 | 4 | 4 | 4 | 3 | 1 |
| Respondent 393 | 2 | 2 | 3 | 3 | 2 | 3 | 3 | 3 | 2 | 3 | 5 | 2 |
| Respondent 394 | 1 | 3 | 4 | 4 | 2 | 5 | 4 | 4 | 2 | 4 | 4 | 3 |
| Respondent 395 | 1 | 4 | 3 | 2 | 2 | 1 | 2 | 1 | 4 | 3 | 3 | 1 |
| Respondent 396 | 2 | 1 | 1 | 4 | 3 | 3 | 2 | 3 | 1 | 5 | 3 | 2 |
| Respondent 397 | 1 | 2 | 2 | 1 | 4 | 4 | 2 | 4 | 3 | 2 | 5 | 2 |
| Respondent 398 | 2 | 3 | 3 | 3 | 1 | 2 | 3 | 3 | 4 | 3 | 4 | 2 |
| Respondent 399 | 2 | 2 | 4 | 4 | 2 | 4 | 4 | 4 | 2 | 4 | 3 | 3 |
| Respondent 400 | 3 | 2 | 1 | 2 | 3 | 2 | 1 | 2 | 2 | 2 | 4 | 2 |
| Respondent 401 | 1 | 3 | 2 | 4 | 1 | 4 | 3 | 2 | 4 | 4 | 4 | 2 |
| Respondent 402 | 3 | 3 | 2 | 2 | 2 | 3 | 4 | 4 | 1 | 2 | 4 | 3 |
| Respondent 403 | 1 | 4 | 2 | 2 | 2 | 5 | 2 | 1 | 3 | 4 | 3 | 3 |
| Respondent 404 | 1 | 3 | 3 | 4 | 2 | 1 | 2 | 2 | 4 | 2 | 5 | 3 |
| Respondent 405 | 1 | 2 | 2 | 1 | 3 | 3 | 4 | 4 | 1 | 4 | 6 | 2 |
| Respondent 406 | 2 | 1 | 3 | 3 | 2 | 4 | 1 | 2 | 3 | 3 | 4 | 3 |
| Respondent 407 | 1 | 3 | 4 | 4 | 2 | 3 | 3 | 2 | 3 | 4 | 3 | 4 |
| Respondent 408 | 4 | 4 | 2 | 3 | 1 | 3 | 4 | 2 | 2 | 2 | 5 | 2 |
| Respondent 409 | 1 | 1 | 3 | 4 | 2 | 4 | 4 | 3 | 4 | 2 | 3 | 4 |
| Respondent 410 | 3 | 2 | 2 | 4 | 2 | 3 | 1 | 2 | 1 | 4 | 4 | 2 |
| Respondent 411 | 3 | 1 | 2 | 1 | 2 | 5 | 3 | 2 | 3 | 2 | 2 | 3 |
| Respondent 412 | 1 | 2 | 2 | 3 | 3 | 1 | 4 | 3 | 4 | 4 | 5 | 3 |
| Respondent 413 | 2 | 3 | 3 | 4 | 4 | 3 | 2 | 2 | 2 | 3 | 5 | 4 |
| Respondent 414 | 1 | 4 | 2 | 2 | 1 | 4 | 4 | 2 | 2 | 4 | 2 | 2 |
| Respondent 415 | 2 | 1 | 2 | 4 | 2 | 2 | 3 | 3 | 3 | 2 | 3 | 2 |
| Respondent 416 | 3 | 2 | 3 | 1 | 3 | 4 | 4 | 3 | 4 | 2 | 5 | 3 |
| Respondent 417 | 2 | 3 | 3 | 3 | 1 | 2 | 2 | 4 | 2 | 4 | 4 | 4 |

*Response to questionnaire (13-24)*

|               | Fri1 | Fri2 | Fri3 | Fri4 | Con1 | Con2 | Con3 | Con4 | Ope1 | Ope2 | Ope3 | Ope4 |
|---------------|------|------|------|------|------|------|------|------|------|------|------|------|
| Respondent 1  | 3    | 2    | 3    | 3    | 2    | 1    | 4    | 1    | 2    | 2    | 3    | 2    |
| Respondent 2  | 1    | 2    | 4    | 2    | 2    | 1    | 1    | 3    | 2    | 2    | 4    | 2    |
| Respondent 3  | 2    | 3    | 3    | 3    | 1    | 2    | 2    | 2    | 3    | 3    | 1    | 3    |
| Respondent 4  | 1    | 3    | 5    | 4    | 2    | 3    | 3    | 3    | 1    | 3    | 2    | 3    |
| Respondent 5  | 2    | 4    | 1    | 3    | 2    | 2    | 2    | 2    | 2    | 4    | 2    | 4    |
| Respondent 6  | 2    | 3    | 3    | 4    | 2    | 2    | 3    | 3    | 1    | 3    | 2    | 3    |
| Respondent 7  | 3    | 5    | 4    | 2    | 3    | 3    | 4    | 4    | 2    | 5    | 3    | 4    |
| Respondent 8  | 3    | 1    | 1    | 3    | 1    | 3    | 3    | 3    | 2    | 1    | 4    | 1    |
| Respondent 9  | 3    | 3    | 2    | 2    | 1    | 4    | 4    | 4    | 3    | 3    | 1    | 3    |
| Respondent 10 | 1    | 4    | 2    | 2    | 2    | 3    | 1    | 4    | 3    | 4    | 2    | 4    |
| Respondent 11 | 1    | 1    | 2    | 3    | 2    | 5    | 2    | 3    | 3    | 1    | 3    | 2    |
| Respondent 12 | 1    | 2    | 3    | 4    | 3    | 1    | 2    | 5    | 1    | 2    | 2    | 2    |
| Respondent 13 | 2    | 2    | 4    | 3    | 2    | 3    | 2    | 3    | 1    | 2    | 2    | 4    |
| Respondent 14 | 3    | 2    | 1    | 1    | 1    | 4    | 3    | 4    | 1    | 2    | 3    | 1    |
| Respondent 15 | 4    | 3    | 2    | 5    | 2    | 1    | 4    | 2    | 2    | 3    | 3    | 3    |
| Respondent 16 | 1    | 4    | 3    | 3    | 2    | 2    | 1    | 3    | 3    | 4    | 4    | 4    |
| Respondent 17 | 1    | 1    | 2    | 4    | 3    | 1    | 3    | 4    | 4    | 1    | 3    | 2    |
| Respondent 18 | 5    | 2    | 3    | 3    | 2    | 2    | 5    | 1    | 1    | 2    | 4    | 2    |
| Respondent 19 | 1    | 3    | 4    | 2    | 2    | 3    | 3    | 3    | 1    | 3    | 1    | 4    |
| Respondent 20 | 2    | 2    | 3    | 4    | 3    | 4    | 4    | 2    | 5    | 2    | 3    | 1    |
| Respondent 21 | 1    | 2    | 4    | 3    | 2    | 1    | 4    | 1    | 1    | 2    | 4    | 3    |
| Respondent 22 | 2    | 3    | 1    | 2    | 2    | 1    | 1    | 3    | 2    | 3    | 2    | 4    |
| Respondent 23 | 3    | 3    | 2    | 3    | 1    | 2    | 2    | 2    | 1    | 3    | 2    | 1    |
| Respondent 24 | 2    | 4    | 2    | 4    | 2    | 3    | 3    | 3    | 2    | 4    | 1    | 3    |
| Respondent 25 | 2    | 3    | 2    | 3    | 2    | 2    | 2    | 2    | 3    | 3    | 2    | 4    |
| Respondent 26 | 3    | 4    | 3    | 4    | 3    | 3    | 3    | 1    | 2    | 4    | 3    | 2    |
| Respondent 27 | 1    | 1    | 4    | 2    | 3    | 5    | 4    | 2    | 2    | 1    | 4    | 2    |
| Respondent 28 | 2    | 3    | 1    | 3    | 4    | 1    | 3    | 2    | 3    | 3    | 1    | 4    |
| Respondent 29 | 1    | 4    | 2    | 2    | 3    | 3    | 4    | 2    | 1    | 4    | 2    | 1    |
| Respondent 30 | 2    | 2    | 3    | 2    | 5    | 4    | 2    | 3    | 2    | 2    | 3    | 3    |
| Respondent 31 | 2    | 2    | 2    | 3    | 1    | 1    | 3    | 1    | 1    | 2    | 2    | 4    |
| Respondent 32 | 3    | 1    | 3    | 4    | 3    | 2    | 2    | 1    | 2    | 1    | 2    | 2    |
| Respondent 33 | 3    | 2    | 4    | 3    | 4    | 2    | 2    | 2    | 2    | 2    | 3    | 4    |
| Respondent 34 | 3    | 3    | 3    | 3    | 1    | 2    | 3    | 2    | 2    | 2    | 4    | 2    |
| Respondent 35 | 1    | 4    | 4    | 5    | 2    | 3    | 4    | 3    | 2    | 2    | 3    | 3    |
| Respondent 36 | 1    | 1    | 1    | 3    | 2    | 4    | 3    | 2    | 1    | 2    | 3    | 3    |
| Respondent 37 | 1    | 2    | 2    | 4    | 2    | 1    | 1    | 1    | 2    | 3    | 5    | 4    |
| Respondent 38 | 2    | 3    | 2    | 3    | 3    | 2    | 5    | 2    | 3    | 4    | 3    | 3    |
| Respondent 39 | 3    | 2    | 2    | 2    | 4    | 3    | 3    | 2    | 4    | 1    | 4    | 3    |
| Respondent 40 | 4    | 2    | 3    | 3    | 1    | 2    | 4    | 3    | 1    | 2    | 3    | 3    |
| Respondent 41 | 1    | 3    | 4    | 3    | 2    | 3    | 3    | 2    | 2    | 2    | 4    | 2    |
| Respondent 42 | 1    | 3    | 1    | 2    | 3    | 4    | 2    | 2    | 2    | 2    | 3    | 3    |
| Respondent 43 | 5    | 4    | 2    | 3    | 2    | 3    | 4    | 3    | 1    | 2    | 3    | 3    |
| Respondent 44 | 1    | 3    | 3    | 4    | 2    | 4    | 3    | 2    | 2    | 1    | 4    | 1    |
| Respondent 45 | 3    | 1    | 2    | 3    | 3    | 1    | 2    | 2    | 3    | 3    | 1    | 3    |
| Respondent 46 | 1    | 2    | 3    | 4    | 3    | 2    | 3    | 1    | 3    | 4    | 2    | 4    |
| Respondent 47 | 2    | 3    | 5    | 2    | 4    | 2    | 4    | 2    | 3    | 1    | 3    | 2    |
| Respondent 48 | 1    | 4    | 3    | 3    | 3    | 2    | 3    | 2    | 1    | 2    | 2    | 2    |
| Respondent 49 | 2    | 1    | 4    | 2    | 3    | 3    | 3    | 1    | 1    | 2    | 2    | 4    |

|                |   |   |   |   |   |   |   |   |   |   |   |   |
|----------------|---|---|---|---|---|---|---|---|---|---|---|---|
| Respondent 50  | 2 | 2 | 1 | 2 | 3 | 5 | 4 | 2 | 1 | 2 | 3 | 1 |
| Respondent 51  | 3 | 2 | 2 | 3 | 4 | 1 | 3 | 2 | 2 | 3 | 3 | 3 |
| Respondent 52  | 3 | 2 | 2 | 4 | 2 | 2 | 1 | 3 | 3 | 4 | 4 | 4 |
| Respondent 53  | 2 | 3 | 2 | 3 | 3 | 1 | 3 | 4 | 4 | 1 | 3 | 2 |
| Respondent 54  | 2 | 4 | 3 | 3 | 2 | 2 | 5 | 1 | 2 | 2 | 3 | 2 |
| Respondent 55  | 3 | 3 | 4 | 5 | 2 | 3 | 3 | 3 | 2 | 2 | 4 | 2 |
| Respondent 56  | 3 | 2 | 1 | 3 | 3 | 4 | 4 | 2 | 3 | 3 | 1 | 3 |
| Respondent 57  | 3 | 3 | 2 | 4 | 2 | 1 | 4 | 1 | 1 | 3 | 2 | 3 |
| Respondent 58  | 1 | 2 | 3 | 3 | 2 | 1 | 1 | 3 | 2 | 4 | 2 | 4 |
| Respondent 59  | 1 | 2 | 2 | 2 | 1 | 2 | 2 | 2 | 1 | 3 | 2 | 3 |
| Respondent 60  | 1 | 3 | 3 | 3 | 2 | 3 | 3 | 3 | 2 | 5 | 3 | 4 |
| Respondent 61  | 2 | 2 | 4 | 3 | 2 | 2 | 2 | 2 | 2 | 1 | 4 | 1 |
| Respondent 62  | 3 | 3 | 3 | 2 | 3 | 3 | 3 | 1 | 3 | 3 | 1 | 3 |
| Respondent 63  | 4 | 2 | 5 | 3 | 3 | 5 | 4 | 2 | 3 | 4 | 2 | 4 |
| Respondent 64  | 1 | 2 | 1 | 4 | 4 | 1 | 3 | 2 | 3 | 1 | 3 | 2 |
| Respondent 65  | 1 | 3 | 2 | 3 | 3 | 3 | 4 | 2 | 1 | 2 | 2 | 2 |
| Respondent 66  | 5 | 3 | 2 | 4 | 5 | 4 | 2 | 3 | 1 | 2 | 2 | 4 |
| Respondent 67  | 1 | 4 | 2 | 2 | 1 | 1 | 3 | 1 | 1 | 2 | 3 | 1 |
| Respondent 68  | 3 | 3 | 3 | 3 | 3 | 2 | 2 | 1 | 2 | 3 | 3 | 3 |
| Respondent 69  | 1 | 5 | 4 | 2 | 4 | 2 | 2 | 2 | 3 | 4 | 4 | 4 |
| Respondent 70  | 2 | 1 | 1 | 2 | 1 | 2 | 3 | 2 | 4 | 1 | 3 | 2 |
| Respondent 71  | 2 | 3 | 2 | 3 | 2 | 3 | 4 | 3 | 1 | 2 | 4 | 2 |
| Respondent 72  | 3 | 4 | 3 | 4 | 2 | 4 | 3 | 2 | 1 | 3 | 1 | 4 |
| Respondent 73  | 3 | 1 | 2 | 3 | 2 | 2 | 1 | 3 | 5 | 2 | 3 | 1 |
| Respondent 74  | 3 | 2 | 3 | 3 | 3 | 1 | 3 | 4 | 1 | 2 | 4 | 3 |
| Respondent 75  | 1 | 2 | 4 | 5 | 2 | 2 | 5 | 1 | 2 | 3 | 2 | 4 |
| Respondent 76  | 1 | 2 | 3 | 3 | 2 | 3 | 3 | 3 | 1 | 3 | 2 | 1 |
| Respondent 77  | 1 | 3 | 4 | 4 | 3 | 4 | 4 | 2 | 2 | 4 | 1 | 3 |
| Respondent 78  | 2 | 4 | 1 | 3 | 5 | 4 | 2 | 3 | 3 | 3 | 2 | 4 |
| Respondent 79  | 3 | 1 | 2 | 2 | 1 | 1 | 3 | 1 | 2 | 4 | 3 | 2 |
| Respondent 80  | 4 | 2 | 2 | 3 | 3 | 2 | 2 | 1 | 2 | 1 | 4 | 2 |
| Respondent 81  | 1 | 3 | 2 | 3 | 4 | 2 | 2 | 2 | 3 | 3 | 1 | 4 |
| Respondent 82  | 1 | 2 | 3 | 2 | 1 | 2 | 3 | 2 | 1 | 4 | 2 | 1 |
| Respondent 83  | 5 | 2 | 4 | 3 | 2 | 3 | 4 | 3 | 2 | 2 | 3 | 3 |
| Respondent 84  | 1 | 3 | 1 | 4 | 2 | 4 | 3 | 2 | 1 | 2 | 2 | 4 |
| Respondent 85  | 3 | 3 | 2 | 3 | 2 | 1 | 1 | 1 | 2 | 1 | 2 | 2 |
| Respondent 86  | 1 | 4 | 3 | 4 | 3 | 2 | 5 | 2 | 2 | 2 | 3 | 4 |
| Respondent 87  | 2 | 3 | 3 | 2 | 4 | 3 | 3 | 2 | 3 | 3 | 3 | 1 |
| Respondent 88  | 2 | 4 | 5 | 3 | 1 | 2 | 4 | 3 | 3 | 4 | 4 | 3 |
| Respondent 89  | 3 | 1 | 3 | 2 | 2 | 3 | 3 | 2 | 3 | 1 | 3 | 4 |
| Respondent 90  | 3 | 3 | 4 | 2 | 3 | 4 | 2 | 2 | 2 | 2 | 3 | 2 |
| Respondent 91  | 2 | 4 | 1 | 3 | 2 | 3 | 4 | 3 | 2 | 2 | 4 | 2 |
| Respondent 92  | 3 | 2 | 2 | 4 | 2 | 4 | 3 | 2 | 2 | 2 | 3 | 3 |
| Respondent 93  | 2 | 2 | 2 | 3 | 3 | 1 | 2 | 2 | 1 | 2 | 3 | 3 |
| Respondent 94  | 2 | 1 | 2 | 3 | 3 | 2 | 3 | 1 | 2 | 3 | 5 | 4 |
| Respondent 95  | 3 | 2 | 3 | 5 | 4 | 2 | 4 | 2 | 3 | 4 | 3 | 3 |
| Respondent 96  | 1 | 3 | 4 | 3 | 3 | 2 | 3 | 2 | 4 | 1 | 4 | 3 |
| Respondent 97  | 2 | 4 | 1 | 4 | 3 | 3 | 3 | 1 | 1 | 2 | 3 | 3 |
| Respondent 98  | 2 | 1 | 2 | 3 | 3 | 5 | 4 | 2 | 3 | 3 | 1 | 3 |
| Respondent 99  | 3 | 2 | 3 | 2 | 5 | 4 | 2 | 3 | 3 | 4 | 2 | 4 |
| Respondent 100 | 2 | 3 | 2 | 3 | 1 | 1 | 3 | 1 | 3 | 1 | 3 | 2 |
| Respondent 101 | 2 | 2 | 3 | 3 | 3 | 2 | 2 | 1 | 1 | 2 | 2 | 2 |
| Respondent 102 | 3 | 2 | 4 | 2 | 4 | 2 | 2 | 2 | 1 | 2 | 2 | 4 |
| Respondent 103 | 1 | 3 | 3 | 3 | 1 | 2 | 3 | 2 | 1 | 2 | 3 | 1 |

|                |   |   |   |   |   |   |   |   |   |   |   |   |
|----------------|---|---|---|---|---|---|---|---|---|---|---|---|
| Respondent 104 | 2 | 3 | 5 | 4 | 2 | 3 | 4 | 3 | 2 | 3 | 3 | 3 |
| Respondent 105 | 2 | 4 | 1 | 3 | 2 | 4 | 3 | 2 | 3 | 4 | 4 | 4 |
| Respondent 106 | 3 | 3 | 2 | 4 | 2 | 1 | 1 | 1 | 4 | 1 | 3 | 2 |
| Respondent 107 | 3 | 1 | 2 | 4 | 3 | 2 | 5 | 2 | 1 | 2 | 4 | 2 |
| Respondent 108 | 3 | 1 | 2 | 2 | 4 | 3 | 3 | 2 | 1 | 3 | 1 | 4 |
| Respondent 109 | 1 | 2 | 3 | 3 | 1 | 2 | 4 | 3 | 5 | 2 | 3 | 1 |
| Respondent 110 | 1 | 3 | 4 | 2 | 2 | 3 | 3 | 2 | 2 | 2 | 4 | 2 |
| Respondent 111 | 1 | 2 | 1 | 2 | 3 | 4 | 2 | 2 | 3 | 3 | 1 | 3 |
| Respondent 112 | 2 | 2 | 2 | 3 | 2 | 3 | 4 | 3 | 1 | 3 | 2 | 3 |
| Respondent 113 | 3 | 3 | 3 | 4 | 2 | 4 | 3 | 2 | 2 | 4 | 2 | 4 |
| Respondent 114 | 4 | 3 | 2 | 3 | 3 | 1 | 2 | 2 | 1 | 3 | 2 | 3 |
| Respondent 115 | 1 | 4 | 3 | 1 | 3 | 2 | 3 | 1 | 2 | 5 | 3 | 4 |
| Respondent 116 | 1 | 3 | 4 | 5 | 4 | 2 | 4 | 2 | 2 | 1 | 4 | 1 |
| Respondent 117 | 5 | 5 | 3 | 3 | 3 | 2 | 3 | 2 | 3 | 3 | 1 | 3 |
| Respondent 118 | 1 | 1 | 4 | 4 | 3 | 3 | 3 | 1 | 3 | 4 | 2 | 4 |
| Respondent 119 | 3 | 3 | 1 | 3 | 3 | 5 | 4 | 2 | 3 | 1 | 3 | 2 |
| Respondent 120 | 1 | 4 | 2 | 2 | 5 | 4 | 2 | 3 | 1 | 2 | 2 | 2 |
| Respondent 121 | 2 | 1 | 2 | 4 | 1 | 1 | 3 | 1 | 1 | 2 | 2 | 4 |
| Respondent 122 | 2 | 2 | 2 | 4 | 3 | 2 | 2 | 1 | 1 | 2 | 3 | 1 |
| Respondent 123 | 3 | 1 | 3 | 2 | 4 | 2 | 2 | 2 | 2 | 3 | 3 | 3 |
| Respondent 124 | 3 | 2 | 4 | 3 | 1 | 2 | 3 | 2 | 3 | 4 | 4 | 4 |
| Respondent 125 | 3 | 3 | 1 | 2 | 2 | 3 | 4 | 3 | 4 | 1 | 3 | 2 |
| Respondent 126 | 2 | 4 | 3 | 2 | 2 | 4 | 3 | 2 | 1 | 2 | 4 | 2 |
| Respondent 127 | 3 | 1 | 5 | 3 | 2 | 1 | 1 | 1 | 1 | 3 | 1 | 4 |
| Respondent 128 | 2 | 2 | 3 | 4 | 3 | 2 | 5 | 2 | 5 | 2 | 3 | 1 |
| Respondent 129 | 2 | 3 | 4 | 3 | 5 | 2 | 4 | 3 | 1 | 2 | 4 | 3 |
| Respondent 130 | 3 | 2 | 1 | 1 | 1 | 3 | 1 | 4 | 2 | 3 | 2 | 4 |
| Respondent 131 | 4 | 2 | 2 | 5 | 3 | 3 | 2 | 3 | 1 | 3 | 2 | 1 |
| Respondent 132 | 1 | 3 | 2 | 3 | 1 | 4 | 3 | 4 | 2 | 4 | 1 | 3 |
| Respondent 133 | 1 | 3 | 2 | 4 | 2 | 3 | 3 | 2 | 3 | 3 | 2 | 4 |
| Respondent 134 | 2 | 4 | 3 | 3 | 2 | 4 | 5 | 3 | 2 | 4 | 3 | 2 |
| Respondent 135 | 3 | 3 | 4 | 2 | 3 | 1 | 3 | 2 | 2 | 1 | 4 | 2 |
| Respondent 136 | 2 | 5 | 1 | 4 | 3 | 3 | 4 | 2 | 3 | 3 | 1 | 4 |
| Respondent 137 | 2 | 1 | 2 | 4 | 2 | 4 | 1 | 3 | 1 | 4 | 2 | 1 |
| Respondent 138 | 3 | 3 | 3 | 2 | 3 | 2 | 2 | 4 | 2 | 2 | 3 | 3 |
| Respondent 139 | 1 | 2 | 2 | 3 | 2 | 2 | 2 | 3 | 1 | 2 | 2 | 4 |
| Respondent 140 | 2 | 2 | 3 | 2 | 2 | 1 | 2 | 3 | 2 | 1 | 2 | 2 |
| Respondent 141 | 2 | 3 | 4 | 2 | 3 | 2 | 3 | 5 | 2 | 2 | 3 | 4 |
| Respondent 142 | 3 | 3 | 3 | 3 | 1 | 3 | 4 | 3 | 3 | 3 | 3 | 1 |
| Respondent 143 | 2 | 4 | 5 | 4 | 2 | 4 | 1 | 4 | 3 | 4 | 4 | 3 |
| Respondent 144 | 2 | 3 | 1 | 3 | 2 | 1 | 2 | 3 | 3 | 1 | 3 | 4 |
| Respondent 145 | 3 | 5 | 2 | 1 | 3 | 2 | 3 | 2 | 1 | 2 | 1 | 2 |
| Respondent 146 | 1 | 1 | 2 | 5 | 2 | 3 | 2 | 3 | 1 | 3 | 2 | 2 |
| Respondent 147 | 2 | 3 | 2 | 3 | 2 | 2 | 3 | 3 | 1 | 2 | 3 | 4 |
| Respondent 148 | 2 | 4 | 3 | 4 | 3 | 2 | 4 | 2 | 2 | 2 | 4 | 1 |
| Respondent 149 | 3 | 1 | 4 | 3 | 5 | 2 | 4 | 3 | 2 | 2 | 4 | 2 |
| Respondent 150 | 2 | 2 | 1 | 2 | 1 | 3 | 1 | 4 | 3 | 3 | 1 | 3 |
| Respondent 151 | 2 | 2 | 2 | 4 | 3 | 3 | 2 | 3 | 1 | 3 | 2 | 3 |
| Respondent 152 | 3 | 2 | 3 | 4 | 1 | 4 | 3 | 4 | 2 | 4 | 2 | 4 |
| Respondent 153 | 1 | 3 | 2 | 2 | 2 | 3 | 3 | 2 | 1 | 3 | 2 | 3 |
| Respondent 154 | 2 | 4 | 3 | 3 | 2 | 4 | 5 | 3 | 2 | 5 | 3 | 4 |
| Respondent 155 | 2 | 1 | 4 | 2 | 3 | 1 | 3 | 2 | 2 | 1 | 4 | 1 |
| Respondent 156 | 2 | 2 | 3 | 2 | 3 | 3 | 4 | 2 | 3 | 3 | 1 | 3 |
| Respondent 157 | 2 | 3 | 4 | 3 | 2 | 4 | 1 | 3 | 3 | 4 | 2 | 4 |

|                |   |   |   |   |   |   |   |   |   |   |   |   |
|----------------|---|---|---|---|---|---|---|---|---|---|---|---|
| Respondent 158 | 2 | 2 | 1 | 4 | 3 | 2 | 2 | 4 | 3 | 1 | 3 | 2 |
| Respondent 159 | 3 | 2 | 2 | 3 | 2 | 2 | 2 | 3 | 1 | 2 | 2 | 2 |
| Respondent 160 | 1 | 3 | 2 | 2 | 2 | 1 | 2 | 3 | 1 | 2 | 2 | 4 |
| Respondent 161 | 2 | 3 | 2 | 3 | 3 | 2 | 3 | 5 | 1 | 2 | 3 | 1 |
| Respondent 162 | 2 | 4 | 3 | 4 | 1 | 3 | 4 | 3 | 2 | 3 | 3 | 3 |
| Respondent 163 | 3 | 3 | 4 | 1 | 2 | 4 | 1 | 4 | 3 | 4 | 4 | 4 |
| Respondent 164 | 2 | 4 | 1 | 3 | 2 | 1 | 2 | 3 | 4 | 1 | 3 | 2 |
| Respondent 165 | 2 | 1 | 3 | 5 | 3 | 2 | 3 | 2 | 1 | 2 | 4 | 2 |
| Respondent 166 | 3 | 3 | 5 | 3 | 2 | 3 | 2 | 3 | 1 | 3 | 1 | 4 |
| Respondent 167 | 1 | 4 | 3 | 4 | 2 | 2 | 3 | 3 | 5 | 2 | 3 | 1 |
| Respondent 168 | 2 | 2 | 4 | 2 | 3 | 2 | 4 | 2 | 1 | 2 | 4 | 3 |
| Respondent 169 | 2 | 2 | 1 | 3 | 5 | 2 | 4 | 3 | 2 | 3 | 2 | 4 |
| Respondent 170 | 3 | 1 | 2 | 4 | 1 | 3 | 1 | 4 | 1 | 3 | 2 | 1 |
| Respondent 171 | 2 | 2 | 2 | 1 | 3 | 3 | 2 | 3 | 2 | 4 | 1 | 3 |
| Respondent 172 | 2 | 3 | 2 | 3 | 1 | 4 | 3 | 4 | 3 | 3 | 2 | 4 |
| Respondent 173 | 3 | 4 | 3 | 5 | 2 | 3 | 3 | 2 | 2 | 4 | 3 | 2 |
| Respondent 174 | 1 | 1 | 4 | 3 | 2 | 4 | 5 | 3 | 2 | 1 | 4 | 2 |
| Respondent 175 | 2 | 2 | 1 | 4 | 3 | 1 | 3 | 2 | 3 | 3 | 1 | 4 |
| Respondent 176 | 2 | 3 | 2 | 2 | 3 | 3 | 4 | 2 | 1 | 4 | 2 | 1 |
| Respondent 177 | 3 | 2 | 3 | 3 | 2 | 4 | 1 | 3 | 2 | 2 | 3 | 3 |
| Respondent 178 | 2 | 2 | 2 | 4 | 3 | 2 | 2 | 4 | 1 | 2 | 2 | 4 |
| Respondent 179 | 2 | 3 | 3 | 1 | 2 | 2 | 2 | 3 | 2 | 1 | 2 | 2 |
| Respondent 180 | 3 | 3 | 4 | 3 | 2 | 1 | 2 | 3 | 2 | 2 | 3 | 4 |
| Respondent 181 | 1 | 4 | 3 | 5 | 3 | 2 | 3 | 5 | 3 | 3 | 3 | 1 |
| Respondent 182 | 2 | 3 | 5 | 3 | 1 | 3 | 4 | 3 | 3 | 4 | 4 | 3 |
| Respondent 183 | 2 | 1 | 1 | 4 | 2 | 4 | 1 | 4 | 3 | 1 | 3 | 4 |
| Respondent 184 | 1 | 2 | 2 | 2 | 2 | 1 | 2 | 3 | 1 | 2 | 1 | 2 |
| Respondent 185 | 2 | 3 | 2 | 3 | 3 | 2 | 3 | 2 | 1 | 3 | 2 | 2 |
| Respondent 186 | 2 | 4 | 2 | 4 | 2 | 3 | 2 | 3 | 1 | 2 | 3 | 4 |
| Respondent 187 | 3 | 1 | 3 | 1 | 2 | 2 | 3 | 3 | 2 | 2 | 4 | 1 |
| Respondent 188 | 1 | 2 | 4 | 3 | 3 | 2 | 4 | 2 | 2 | 2 | 4 | 2 |
| Respondent 189 | 2 | 2 | 1 | 5 | 5 | 2 | 4 | 3 | 3 | 3 | 1 | 3 |
| Respondent 190 | 2 | 2 | 2 | 3 | 1 | 3 | 1 | 4 | 1 | 3 | 2 | 3 |
| Respondent 191 | 1 | 3 | 3 | 4 | 3 | 3 | 2 | 3 | 2 | 4 | 2 | 4 |
| Respondent 192 | 2 | 4 | 2 | 2 | 1 | 4 | 3 | 4 | 1 | 3 | 2 | 3 |
| Respondent 193 | 2 | 3 | 3 | 3 | 2 | 3 | 3 | 2 | 2 | 5 | 3 | 4 |
| Respondent 194 | 3 | 2 | 4 | 4 | 2 | 4 | 5 | 3 | 2 | 1 | 4 | 1 |
| Respondent 195 | 1 | 3 | 3 | 1 | 3 | 1 | 3 | 2 | 4 | 2 | 3 | 2 |
| Respondent 196 | 2 | 2 | 4 | 3 | 3 | 3 | 4 | 2 | 1 | 2 | 2 | 3 |
| Respondent 197 | 2 | 2 | 1 | 2 | 2 | 4 | 1 | 3 | 3 | 3 | 2 | 4 |
| Respondent 198 | 3 | 3 | 2 | 3 | 3 | 2 | 2 | 4 | 5 | 5 | 2 | 4 |
| Respondent 199 | 2 | 2 | 2 | 2 | 2 | 2 | 2 | 3 | 3 | 1 | 3 | 1 |
| Respondent 200 | 2 | 3 | 2 | 3 | 2 | 1 | 2 | 3 | 4 | 3 | 3 | 2 |
| Respondent 201 | 3 | 2 | 3 | 4 | 3 | 2 | 3 | 5 | 2 | 1 | 4 | 3 |
| Respondent 202 | 1 | 2 | 4 | 3 | 1 | 3 | 4 | 3 | 3 | 2 | 3 | 3 |
| Respondent 203 | 2 | 3 | 1 | 4 | 2 | 4 | 1 | 4 | 4 | 2 | 4 | 5 |
| Respondent 204 | 2 | 3 | 3 | 2 | 2 | 1 | 2 | 3 | 1 | 3 | 1 | 3 |
| Respondent 205 | 3 | 4 | 5 | 3 | 3 | 2 | 3 | 2 | 3 | 3 | 3 | 4 |
| Respondent 206 | 2 | 3 | 3 | 2 | 2 | 3 | 2 | 3 | 2 | 2 | 4 | 1 |
| Respondent 207 | 2 | 5 | 4 | 3 | 2 | 2 | 3 | 3 | 3 | 3 | 2 | 2 |
| Respondent 208 | 3 | 1 | 1 | 4 | 3 | 2 | 4 | 2 | 2 | 2 | 2 | 2 |
| Respondent 209 | 1 | 3 | 2 | 3 | 5 | 2 | 4 | 3 | 3 | 2 | 1 | 2 |
| Respondent 210 | 2 | 4 | 2 | 4 | 1 | 3 | 1 | 4 | 4 | 3 | 2 | 3 |
| Respondent 211 | 2 | 1 | 2 | 3 | 3 | 3 | 2 | 3 | 3 | 1 | 3 | 4 |

|                |   |   |   |   |   |   |   |   |   |   |   |   |
|----------------|---|---|---|---|---|---|---|---|---|---|---|---|
| Respondent 212 | 3 | 2 | 3 | 2 | 1 | 4 | 3 | 4 | 4 | 2 | 4 | 1 |
| Respondent 213 | 2 | 2 | 4 | 2 | 2 | 3 | 3 | 2 | 2 | 2 | 1 | 2 |
| Respondent 214 | 2 | 2 | 1 | 3 | 2 | 4 | 5 | 3 | 3 | 3 | 1 | 4 |
| Respondent 215 | 1 | 3 | 2 | 3 | 3 | 1 | 3 | 2 | 1 | 4 | 2 | 1 |
| Respondent 216 | 2 | 4 | 3 | 4 | 3 | 3 | 4 | 2 | 2 | 2 | 3 | 3 |
| Respondent 217 | 2 | 1 | 2 | 3 | 2 | 4 | 1 | 3 | 1 | 2 | 2 | 4 |
| Respondent 218 | 3 | 2 | 3 | 5 | 3 | 2 | 2 | 4 | 2 | 1 | 2 | 2 |
| Respondent 219 | 2 | 3 | 4 | 2 | 2 | 2 | 2 | 3 | 2 | 2 | 3 | 4 |
| Respondent 220 | 2 | 2 | 3 | 3 | 2 | 1 | 2 | 3 | 3 | 3 | 3 | 1 |
| Respondent 221 | 3 | 2 | 5 | 4 | 3 | 2 | 3 | 5 | 3 | 4 | 4 | 3 |
| Respondent 222 | 1 | 3 | 1 | 1 | 1 | 3 | 4 | 3 | 3 | 1 | 3 | 4 |
| Respondent 223 | 2 | 3 | 2 | 3 | 2 | 4 | 1 | 4 | 3 | 3 | 2 | 4 |
| Respondent 224 | 2 | 4 | 2 | 2 | 2 | 1 | 2 | 3 | 5 | 5 | 2 | 4 |
| Respondent 225 | 3 | 3 | 2 | 3 | 3 | 2 | 3 | 2 | 3 | 1 | 3 | 1 |
| Respondent 226 | 2 | 4 | 3 | 2 | 2 | 3 | 2 | 3 | 4 | 3 | 3 | 2 |
| Respondent 227 | 2 | 1 | 4 | 3 | 2 | 2 | 3 | 3 | 2 | 1 | 4 | 3 |
| Respondent 228 | 3 | 3 | 1 | 4 | 3 | 2 | 4 | 2 | 3 | 2 | 3 | 3 |
| Respondent 229 | 1 | 4 | 2 | 3 | 5 | 2 | 4 | 3 | 4 | 2 | 4 | 5 |
| Respondent 230 | 2 | 2 | 3 | 4 | 3 | 2 | 3 | 3 | 1 | 3 | 1 | 3 |
| Respondent 231 | 2 | 2 | 2 | 4 | 2 | 2 | 2 | 2 | 3 | 3 | 3 | 4 |
| Respondent 232 | 3 | 1 | 3 | 1 | 3 | 2 | 3 | 2 | 2 | 2 | 4 | 1 |
| Respondent 233 | 2 | 2 | 4 | 3 | 2 | 3 | 4 | 3 | 3 | 3 | 2 | 2 |
| Respondent 234 | 1 | 3 | 3 | 5 | 2 | 4 | 3 | 1 | 2 | 2 | 2 | 2 |
| Respondent 235 | 3 | 4 | 4 | 3 | 3 | 1 | 4 | 2 | 3 | 2 | 1 | 2 |
| Respondent 236 | 1 | 1 | 1 | 4 | 3 | 3 | 2 | 2 | 4 | 3 | 2 | 3 |
| Respondent 237 | 1 | 2 | 2 | 2 | 4 | 5 | 3 | 3 | 3 | 1 | 3 | 4 |
| Respondent 238 | 2 | 3 | 2 | 3 | 3 | 3 | 2 | 2 | 4 | 2 | 4 | 1 |
| Respondent 239 | 2 | 2 | 2 | 4 | 5 | 4 | 3 | 2 | 2 | 2 | 1 | 2 |
| Respondent 240 | 3 | 2 | 3 | 1 | 1 | 1 | 4 | 3 | 3 | 3 | 1 | 4 |
| Respondent 241 | 2 | 3 | 4 | 3 | 3 | 2 | 3 | 5 | 1 | 4 | 2 | 1 |
| Respondent 242 | 2 | 3 | 1 | 2 | 4 | 2 | 4 | 1 | 2 | 2 | 3 | 3 |
| Respondent 243 | 3 | 4 | 3 | 3 | 1 | 2 | 3 | 3 | 1 | 2 | 2 | 4 |
| Respondent 244 | 1 | 3 | 5 | 2 | 2 | 3 | 2 | 1 | 2 | 1 | 2 | 2 |
| Respondent 245 | 2 | 1 | 3 | 3 | 2 | 4 | 2 | 2 | 2 | 2 | 3 | 4 |
| Respondent 246 | 2 | 1 | 4 | 2 | 2 | 1 | 3 | 2 | 3 | 3 | 3 | 1 |
| Respondent 247 | 3 | 2 | 1 | 2 | 3 | 2 | 3 | 3 | 3 | 4 | 4 | 3 |
| Respondent 248 | 2 | 3 | 2 | 3 | 4 | 3 | 4 | 3 | 3 | 1 | 3 | 4 |
| Respondent 249 | 2 | 2 | 2 | 3 | 1 | 2 | 3 | 2 | 3 | 3 | 2 | 4 |
| Respondent 250 | 3 | 2 | 2 | 4 | 3 | 2 | 3 | 3 | 5 | 5 | 2 | 4 |
| Respondent 251 | 1 | 3 | 3 | 3 | 2 | 2 | 2 | 2 | 3 | 1 | 3 | 1 |
| Respondent 252 | 2 | 3 | 4 | 5 | 3 | 2 | 3 | 2 | 4 | 3 | 3 | 2 |
| Respondent 253 | 2 | 4 | 1 | 3 | 2 | 3 | 4 | 3 | 2 | 1 | 4 | 3 |
| Respondent 254 | 3 | 3 | 2 | 4 | 2 | 4 | 3 | 1 | 3 | 2 | 3 | 3 |
| Respondent 255 | 2 | 5 | 3 | 2 | 3 | 1 | 4 | 2 | 4 | 2 | 4 | 5 |
| Respondent 256 | 2 | 1 | 2 | 3 | 3 | 3 | 2 | 2 | 1 | 3 | 1 | 3 |
| Respondent 257 | 3 | 3 | 3 | 4 | 4 | 5 | 3 | 3 | 3 | 3 | 3 | 4 |
| Respondent 258 | 1 | 4 | 4 | 1 | 3 | 3 | 2 | 2 | 2 | 2 | 4 | 1 |
| Respondent 259 | 1 | 1 | 3 | 3 | 5 | 4 | 3 | 2 | 3 | 3 | 2 | 2 |
| Respondent 260 | 2 | 2 | 5 | 2 | 1 | 1 | 4 | 3 | 2 | 2 | 2 | 2 |
| Respondent 261 | 2 | 1 | 1 | 3 | 3 | 2 | 3 | 5 | 3 | 2 | 1 | 2 |
| Respondent 262 | 1 | 2 | 2 | 2 | 4 | 2 | 4 | 1 | 4 | 3 | 2 | 3 |
| Respondent 263 | 2 | 3 | 2 | 3 | 1 | 2 | 3 | 3 | 3 | 1 | 3 | 4 |
| Respondent 264 | 2 | 4 | 2 | 4 | 2 | 3 | 2 | 1 | 4 | 2 | 4 | 1 |
| Respondent 265 | 3 | 1 | 3 | 3 | 2 | 4 | 2 | 2 | 2 | 2 | 1 | 2 |

|                |   |   |   |   |   |   |   |   |   |   |   |   |
|----------------|---|---|---|---|---|---|---|---|---|---|---|---|
| Respondent 266 | 1 | 2 | 4 | 4 | 2 | 1 | 3 | 2 | 3 | 3 | 1 | 4 |
| Respondent 267 | 2 | 3 | 1 | 4 | 3 | 2 | 3 | 3 | 1 | 4 | 2 | 1 |
| Respondent 268 | 2 | 2 | 2 | 1 | 4 | 3 | 4 | 3 | 2 | 2 | 3 | 3 |
| Respondent 269 | 3 | 2 | 3 | 3 | 1 | 2 | 3 | 2 | 2 | 2 | 2 | 2 |
| Respondent 270 | 2 | 3 | 2 | 5 | 3 | 2 | 3 | 3 | 3 | 2 | 1 | 2 |
| Respondent 271 | 2 | 3 | 3 | 3 | 2 | 2 | 2 | 2 | 4 | 3 | 2 | 3 |
| Respondent 272 | 3 | 4 | 4 | 4 | 3 | 2 | 3 | 2 | 3 | 1 | 3 | 4 |
| Respondent 273 | 1 | 3 | 3 | 2 | 2 | 3 | 4 | 3 | 4 | 2 | 4 | 1 |
| Respondent 274 | 2 | 5 | 4 | 3 | 2 | 4 | 3 | 1 | 2 | 2 | 1 | 2 |
| Respondent 275 | 2 | 1 | 1 | 4 | 3 | 1 | 4 | 2 | 3 | 3 | 1 | 4 |
| Respondent 276 | 3 | 3 | 2 | 3 | 3 | 3 | 2 | 2 | 1 | 4 | 2 | 1 |
| Respondent 277 | 1 | 2 | 2 | 2 | 4 | 5 | 3 | 3 | 2 | 2 | 3 | 3 |
| Respondent 278 | 2 | 2 | 2 | 2 | 3 | 3 | 2 | 2 | 1 | 2 | 2 | 4 |
| Respondent 279 | 2 | 3 | 3 | 3 | 5 | 4 | 3 | 2 | 2 | 1 | 2 | 2 |
| Respondent 280 | 3 | 3 | 4 | 3 | 1 | 1 | 4 | 3 | 2 | 2 | 3 | 4 |
| Respondent 281 | 2 | 4 | 1 | 4 | 3 | 2 | 3 | 5 | 3 | 3 | 3 | 1 |
| Respondent 282 | 2 | 3 | 3 | 3 | 4 | 2 | 4 | 1 | 3 | 4 | 4 | 3 |
| Respondent 283 | 3 | 5 | 5 | 5 | 1 | 2 | 3 | 3 | 3 | 1 | 3 | 4 |
| Respondent 284 | 1 | 1 | 3 | 3 | 2 | 3 | 2 | 1 | 3 | 3 | 2 | 4 |
| Respondent 285 | 1 | 3 | 4 | 2 | 2 | 4 | 2 | 2 | 5 | 5 | 2 | 4 |
| Respondent 286 | 2 | 4 | 1 | 2 | 2 | 1 | 3 | 2 | 3 | 1 | 3 | 1 |
| Respondent 287 | 2 | 1 | 2 | 3 | 3 | 2 | 3 | 3 | 4 | 3 | 3 | 2 |
| Respondent 288 | 3 | 2 | 2 | 3 | 4 | 3 | 4 | 3 | 2 | 1 | 4 | 3 |
| Respondent 289 | 2 | 2 | 2 | 5 | 1 | 2 | 3 | 2 | 3 | 2 | 3 | 3 |
| Respondent 290 | 2 | 2 | 3 | 3 | 3 | 2 | 3 | 3 | 4 | 2 | 4 | 5 |
| Respondent 291 | 1 | 3 | 4 | 4 | 2 | 2 | 2 | 2 | 1 | 3 | 1 | 3 |
| Respondent 292 | 1 | 4 | 1 | 2 | 3 | 2 | 3 | 2 | 3 | 3 | 3 | 4 |
| Respondent 293 | 2 | 1 | 2 | 3 | 2 | 3 | 4 | 3 | 2 | 2 | 4 | 1 |
| Respondent 294 | 2 | 2 | 3 | 4 | 2 | 4 | 3 | 1 | 3 | 3 | 2 | 2 |
| Respondent 295 | 3 | 3 | 2 | 1 | 3 | 1 | 4 | 2 | 2 | 2 | 2 | 2 |
| Respondent 296 | 2 | 2 | 3 | 3 | 3 | 3 | 2 | 2 | 3 | 2 | 1 | 2 |
| Respondent 297 | 2 | 2 | 4 | 2 | 4 | 5 | 3 | 3 | 4 | 3 | 2 | 3 |
| Respondent 298 | 3 | 3 | 3 | 3 | 3 | 3 | 2 | 2 | 3 | 1 | 3 | 4 |
| Respondent 299 | 1 | 3 | 5 | 2 | 5 | 4 | 3 | 2 | 4 | 2 | 4 | 1 |
| Respondent 300 | 1 | 4 | 1 | 3 | 1 | 1 | 4 | 3 | 2 | 2 | 2 | 2 |
| Respondent 301 | 2 | 3 | 2 | 2 | 3 | 2 | 3 | 5 | 3 | 2 | 1 | 2 |
| Respondent 302 | 2 | 4 | 2 | 2 | 4 | 2 | 4 | 1 | 4 | 3 | 2 | 3 |
| Respondent 303 | 3 | 1 | 2 | 3 | 1 | 2 | 3 | 3 | 3 | 1 | 3 | 4 |
| Respondent 304 | 2 | 3 | 3 | 3 | 2 | 3 | 2 | 1 | 4 | 2 | 4 | 1 |
| Respondent 305 | 2 | 4 | 4 | 4 | 2 | 4 | 2 | 2 | 2 | 2 | 1 | 2 |
| Respondent 306 | 3 | 2 | 1 | 3 | 2 | 3 | 3 | 2 | 3 | 3 | 1 | 4 |
| Respondent 307 | 1 | 2 | 2 | 5 | 3 | 2 | 3 | 3 | 1 | 4 | 2 | 1 |
| Respondent 308 | 1 | 1 | 3 | 3 | 4 | 3 | 4 | 3 | 2 | 2 | 3 | 3 |
| Respondent 309 | 2 | 2 | 2 | 4 | 3 | 3 | 3 | 2 | 1 | 2 | 2 | 4 |
| Respondent 310 | 2 | 3 | 3 | 2 | 2 | 5 | 3 | 2 | 2 | 1 | 2 | 2 |
| Respondent 311 | 1 | 4 | 4 | 3 | 3 | 3 | 2 | 2 | 2 | 2 | 3 | 4 |
| Respondent 312 | 2 | 1 | 3 | 4 | 4 | 4 | 3 | 2 | 3 | 3 | 3 | 1 |
| Respondent 313 | 2 | 2 | 4 | 3 | 3 | 2 | 2 | 3 | 3 | 4 | 4 | 3 |
| Respondent 314 | 3 | 3 | 1 | 3 | 4 | 3 | 2 | 4 | 3 | 1 | 3 | 4 |
| Respondent 315 | 1 | 2 | 2 | 2 | 2 | 4 | 3 | 2 | 3 | 3 | 2 | 4 |
| Respondent 316 | 2 | 2 | 2 | 3 | 2 | 3 | 3 | 3 | 5 | 5 | 2 | 4 |
| Respondent 317 | 2 | 3 | 2 | 2 | 2 | 2 | 4 | 5 | 3 | 1 | 3 | 1 |
| Respondent 318 | 3 | 3 | 3 | 3 | 2 | 2 | 3 | 3 | 4 | 3 | 3 | 2 |
| Respondent 319 | 2 | 4 | 4 | 4 | 3 | 3 | 5 | 4 | 2 | 1 | 4 | 3 |

|                |   |   |   |   |   |   |   |   |   |   |   |   |
|----------------|---|---|---|---|---|---|---|---|---|---|---|---|
| Respondent 320 | 2 | 3 | 1 | 3 | 4 | 3 | 2 | 3 | 3 | 2 | 3 | 3 |
| Respondent 321 | 3 | 1 | 3 | 4 | 2 | 4 | 3 | 2 | 4 | 2 | 4 | 5 |
| Respondent 322 | 1 | 2 | 5 | 4 | 3 | 3 | 4 | 2 | 1 | 3 | 1 | 3 |
| Respondent 323 | 1 | 3 | 3 | 3 | 5 | 5 | 1 | 2 | 3 | 3 | 3 | 4 |
| Respondent 324 | 2 | 4 | 4 | 5 | 4 | 2 | 4 | 2 | 2 | 2 | 4 | 1 |
| Respondent 325 | 2 | 1 | 1 | 3 | 3 | 2 | 3 | 3 | 3 | 3 | 2 | 2 |
| Respondent 326 | 3 | 2 | 2 | 4 | 5 | 3 | 2 | 3 | 2 | 2 | 2 | 2 |
| Respondent 327 | 2 | 2 | 2 | 2 | 3 | 4 | 3 | 4 | 3 | 2 | 1 | 2 |
| Respondent 328 | 1 | 2 | 2 | 3 | 4 | 3 | 3 | 3 | 4 | 3 | 2 | 3 |
| Respondent 329 | 3 | 3 | 3 | 4 | 2 | 2 | 5 | 3 | 3 | 1 | 3 | 4 |
| Respondent 330 | 1 | 4 | 4 | 1 | 3 | 3 | 3 | 2 | 4 | 2 | 4 | 1 |
| Respondent 331 | 1 | 3 | 1 | 3 | 4 | 4 | 4 | 3 | 2 | 2 | 2 | 2 |
| Respondent 332 | 2 | 2 | 2 | 2 | 3 | 3 | 2 | 2 | 3 | 2 | 1 | 2 |
| Respondent 333 | 2 | 3 | 3 | 3 | 3 | 4 | 3 | 2 | 4 | 3 | 2 | 3 |
| Respondent 334 | 3 | 2 | 2 | 2 | 2 | 2 | 4 | 3 | 3 | 1 | 3 | 4 |
| Respondent 335 | 2 | 2 | 3 | 3 | 3 | 2 | 3 | 3 | 4 | 2 | 4 | 1 |
| Respondent 336 | 2 | 3 | 4 | 2 | 2 | 2 | 2 | 4 | 2 | 2 | 1 | 2 |
| Respondent 337 | 1 | 2 | 3 | 2 | 3 | 2 | 2 | 3 | 3 | 3 | 1 | 4 |
| Respondent 338 | 1 | 3 | 5 | 3 | 4 | 3 | 3 | 5 | 1 | 4 | 2 | 1 |
| Respondent 339 | 2 | 2 | 1 | 3 | 3 | 4 | 3 | 2 | 2 | 2 | 3 | 3 |
| Respondent 340 | 2 | 2 | 2 | 4 | 4 | 2 | 2 | 2 | 1 | 2 | 2 | 4 |
| Respondent 341 | 3 | 3 | 2 | 3 | 4 | 3 | 3 | 3 | 2 | 1 | 2 | 2 |
| Respondent 342 | 2 | 3 | 2 | 5 | 3 | 5 | 4 | 4 | 2 | 2 | 3 | 4 |
| Respondent 343 | 2 | 4 | 3 | 3 | 4 | 2 | 3 | 3 | 3 | 3 | 3 | 1 |
| Respondent 344 | 3 | 3 | 4 | 4 | 3 | 2 | 3 | 4 | 3 | 4 | 4 | 3 |
| Respondent 345 | 1 | 5 | 1 | 2 | 5 | 3 | 2 | 2 | 3 | 1 | 3 | 4 |
| Respondent 346 | 1 | 1 | 2 | 3 | 3 | 4 | 3 | 2 | 3 | 3 | 2 | 4 |
| Respondent 347 | 2 | 3 | 3 | 4 | 4 | 3 | 2 | 2 | 5 | 5 | 2 | 4 |
| Respondent 348 | 2 | 4 | 2 | 1 | 2 | 2 | 3 | 2 | 3 | 1 | 3 | 1 |
| Respondent 349 | 2 | 1 | 3 | 3 | 3 | 3 | 4 | 3 | 4 | 3 | 3 | 2 |
| Respondent 350 | 2 | 2 | 4 | 2 | 4 | 4 | 3 | 4 | 2 | 1 | 4 | 3 |
| Respondent 351 | 2 | 2 | 3 | 3 | 3 | 3 | 4 | 2 | 3 | 2 | 3 | 3 |
| Respondent 352 | 3 | 2 | 4 | 2 | 3 | 4 | 2 | 2 | 4 | 2 | 4 | 5 |
| Respondent 353 | 1 | 3 | 1 | 3 | 2 | 2 | 3 | 3 | 1 | 3 | 1 | 3 |
| Respondent 354 | 1 | 4 | 2 | 4 | 3 | 2 | 3 | 3 | 3 | 3 | 3 | 4 |
| Respondent 355 | 2 | 1 | 2 | 3 | 2 | 2 | 2 | 4 | 2 | 2 | 4 | 1 |
| Respondent 356 | 2 | 2 | 2 | 4 | 3 | 2 | 2 | 3 | 3 | 3 | 2 | 2 |
| Respondent 357 | 3 | 3 | 3 | 4 | 4 | 3 | 3 | 5 | 2 | 2 | 2 | 2 |
| Respondent 358 | 2 | 2 | 4 | 3 | 3 | 4 | 3 | 2 | 3 | 2 | 1 | 2 |
| Respondent 359 | 2 | 2 | 1 | 5 | 4 | 2 | 4 | 3 | 4 | 3 | 2 | 3 |
| Respondent 360 | 3 | 3 | 3 | 3 | 4 | 3 | 3 | 4 | 3 | 1 | 3 | 4 |
| Respondent 361 | 1 | 3 | 5 | 4 | 3 | 5 | 5 | 1 | 4 | 2 | 4 | 1 |
| Respondent 362 | 2 | 4 | 3 | 2 | 4 | 2 | 4 | 2 | 2 | 2 | 2 | 2 |
| Respondent 363 | 2 | 3 | 4 | 3 | 3 | 2 | 3 | 3 | 3 | 2 | 1 | 2 |
| Respondent 364 | 3 | 4 | 1 | 4 | 5 | 3 | 2 | 3 | 4 | 3 | 2 | 3 |
| Respondent 365 | 2 | 1 | 2 | 1 | 3 | 4 | 3 | 4 | 3 | 1 | 3 | 4 |
| Respondent 366 | 2 | 3 | 2 | 3 | 4 | 3 | 3 | 3 | 4 | 2 | 4 | 1 |
| Respondent 367 | 3 | 4 | 2 | 2 | 2 | 2 | 5 | 3 | 2 | 2 | 1 | 2 |
| Respondent 368 | 1 | 2 | 3 | 3 | 3 | 3 | 3 | 2 | 3 | 3 | 1 | 4 |
| Respondent 369 | 2 | 2 | 4 | 2 | 4 | 4 | 4 | 3 | 1 | 4 | 2 | 1 |
| Respondent 370 | 2 | 1 | 1 | 3 | 3 | 3 | 2 | 2 | 2 | 2 | 3 | 3 |
| Respondent 371 | 3 | 2 | 2 | 2 | 3 | 4 | 3 | 2 | 1 | 2 | 2 | 4 |
| Respondent 372 | 2 | 3 | 3 | 2 | 2 | 2 | 4 | 3 | 2 | 1 | 2 | 2 |
| Respondent 373 | 2 | 4 | 2 | 3 | 3 | 2 | 3 | 3 | 2 | 2 | 3 | 4 |

|                |   |   |   |   |   |   |   |   |   |   |   |   |
|----------------|---|---|---|---|---|---|---|---|---|---|---|---|
| Respondent 374 | 3 | 1 | 3 | 3 | 2 | 2 | 2 | 4 | 3 | 3 | 3 | 1 |
| Respondent 375 | 1 | 2 | 4 | 4 | 3 | 2 | 2 | 3 | 3 | 4 | 4 | 3 |
| Respondent 376 | 1 | 3 | 3 | 3 | 4 | 3 | 3 | 5 | 3 | 1 | 3 | 4 |
| Respondent 377 | 2 | 2 | 5 | 5 | 3 | 4 | 3 | 2 | 3 | 3 | 2 | 4 |
| Respondent 378 | 2 | 2 | 1 | 3 | 4 | 2 | 4 | 3 | 5 | 5 | 2 | 4 |
| Respondent 379 | 3 | 3 | 2 | 4 | 4 | 3 | 3 | 4 | 3 | 1 | 3 | 1 |
| Respondent 380 | 2 | 3 | 2 | 2 | 3 | 5 | 5 | 1 | 4 | 3 | 3 | 2 |
| Respondent 381 | 2 | 4 | 2 | 3 | 4 | 2 | 4 | 2 | 2 | 1 | 4 | 3 |
| Respondent 382 | 1 | 3 | 3 | 4 | 3 | 2 | 3 | 3 | 3 | 2 | 3 | 3 |
| Respondent 383 | 2 | 1 | 4 | 1 | 5 | 3 | 2 | 3 | 4 | 2 | 4 | 5 |
| Respondent 384 | 2 | 1 | 1 | 3 | 3 | 4 | 3 | 4 | 1 | 3 | 1 | 3 |
| Respondent 385 | 1 | 2 | 2 | 2 | 4 | 3 | 3 | 3 | 3 | 3 | 3 | 4 |
| Respondent 386 | 2 | 3 | 3 | 3 | 2 | 2 | 5 | 3 | 2 | 2 | 4 | 1 |
| Respondent 387 | 2 | 2 | 2 | 2 | 3 | 3 | 3 | 2 | 3 | 3 | 2 | 2 |
| Respondent 388 | 2 | 2 | 3 | 3 | 4 | 4 | 4 | 3 | 2 | 2 | 2 | 2 |
| Respondent 389 | 3 | 3 | 4 | 4 | 3 | 3 | 2 | 2 | 3 | 2 | 1 | 2 |
| Respondent 390 | 1 | 3 | 3 | 3 | 3 | 4 | 3 | 2 | 4 | 3 | 2 | 3 |
| Respondent 391 | 1 | 4 | 4 | 4 | 2 | 2 | 4 | 3 | 3 | 1 | 3 | 4 |
| Respondent 393 | 2 | 3 | 1 | 4 | 3 | 2 | 3 | 3 | 4 | 2 | 4 | 1 |
| Respondent 394 | 2 | 5 | 2 | 3 | 2 | 2 | 2 | 2 | 2 | 2 | 2 | 2 |
| Respondent 395 | 3 | 1 | 2 | 5 | 3 | 3 | 3 | 3 | 3 | 2 | 1 | 2 |
| Respondent 396 | 2 | 3 | 2 | 3 | 4 | 4 | 4 | 4 | 4 | 3 | 2 | 3 |
| Respondent 397 | 1 | 4 | 3 | 4 | 3 | 3 | 3 | 3 | 3 | 1 | 3 | 4 |
| Respondent 398 | 2 | 1 | 4 | 2 | 4 | 3 | 4 | 3 | 4 | 2 | 4 | 1 |
| Respondent 399 | 2 | 2 | 1 | 3 | 4 | 2 | 2 | 2 | 2 | 2 | 1 | 2 |
| Respondent 400 | 3 | 1 | 3 | 4 | 3 | 3 | 2 | 3 | 3 | 3 | 1 | 4 |
| Respondent 401 | 2 | 2 | 5 | 1 | 4 | 2 | 2 | 2 | 1 | 4 | 2 | 1 |
| Respondent 402 | 2 | 3 | 3 | 3 | 3 | 3 | 2 | 3 | 2 | 2 | 3 | 3 |
| Respondent 403 | 3 | 4 | 4 | 2 | 5 | 4 | 3 | 4 | 1 | 2 | 2 | 4 |
| Respondent 404 | 1 | 1 | 1 | 3 | 3 | 3 | 4 | 3 | 2 | 1 | 2 | 2 |
| Respondent 405 | 2 | 2 | 2 | 2 | 4 | 4 | 2 | 4 | 2 | 2 | 3 | 4 |
| Respondent 406 | 3 | 3 | 2 | 3 | 2 | 2 | 2 | 2 | 3 | 3 | 3 | 1 |
| Respondent 407 | 2 | 2 | 2 | 2 | 3 | 3 | 3 | 3 | 3 | 4 | 4 | 3 |
| Respondent 408 | 2 | 2 | 3 | 2 | 4 | 4 | 4 | 3 | 3 | 1 | 3 | 4 |
| Respondent 409 | 3 | 3 | 4 | 3 | 3 | 3 | 2 | 2 | 3 | 3 | 2 | 4 |
| Respondent 410 | 1 | 3 | 1 | 3 | 3 | 4 | 3 | 2 | 5 | 5 | 2 | 4 |
| Respondent 411 | 2 | 4 | 2 | 4 | 2 | 2 | 4 | 3 | 3 | 1 | 3 | 1 |
| Respondent 412 | 2 | 3 | 3 | 3 | 3 | 2 | 3 | 3 | 4 | 3 | 3 | 2 |
| Respondent 413 | 2 | 5 | 2 | 5 | 2 | 2 | 2 | 4 | 2 | 1 | 4 | 3 |
| Respondent 414 | 3 | 1 | 3 | 3 | 3 | 2 | 2 | 3 | 3 | 2 | 3 | 3 |
| Respondent 415 | 2 | 3 | 4 | 4 | 4 | 3 | 3 | 5 | 4 | 2 | 4 | 5 |
| Respondent 416 | 2 | 2 | 3 | 2 | 3 | 4 | 3 | 2 | 1 | 3 | 1 | 3 |
| Respondent 417 | 3 | 2 | 5 | 3 | 4 | 2 | 4 | 3 | 3 | 3 | 3 | 4 |

*Response to questionnaire (25-36)*

|               | Cow1 | Cow2 | Cow3 | Cow4 | Nat1 | Nat2 | Nat3 | Nat4 | Com1 | Com2 | Com3 | Com4 |
|---------------|------|------|------|------|------|------|------|------|------|------|------|------|
| Respondent 1  | 2    | 3    | 3    | 3    | 3    | 3    | 4    | 4    | 2    | 2    | 3    | 4    |
| Respondent 2  | 2    | 4    | 2    | 2    | 4    | 2    | 4    | 2    | 2    | 2    | 4    | 3    |
| Respondent 3  | 3    | 3    | 4    | 2    | 2    | 2    | 3    | 2    | 4    | 3    | 4    | 2    |
| Respondent 4  | 3    | 3    | 4    | 4    | 2    | 3    | 4    | 3    | 2    | 3    | 3    | 3    |
| Respondent 5  | 4    | 1    | 3    | 2    | 2    | 4    | 3    | 5    | 5    | 2    | 3    | 3    |
| Respondent 6  | 3    | 3    | 4    | 5    | 2    | 3    | 4    | 3    | 3    | 2    | 4    | 3    |
| Respondent 7  | 5    | 4    | 2    | 3    | 4    | 2    | 5    | 3    | 5    | 3    | 3    | 4    |
| Respondent 8  | 2    | 2    | 4    | 3    | 4    | 3    | 3    | 3    | 3    | 2    | 3    | 3    |
| Respondent 9  | 3    | 3    | 5    | 5    | 3    | 4    | 4    | 4    | 2    | 2    | 4    | 3    |
| Respondent 10 | 4    | 2    | 4    | 3    | 2    | 3    | 4    | 3    | 3    | 3    | 3    | 4    |
| Respondent 11 | 2    | 2    | 3    | 2    | 4    | 4    | 2    | 5    | 2    | 3    | 3    | 4    |
| Respondent 12 | 2    | 3    | 4    | 3    | 2    | 3    | 4    | 3    | 4    | 4    | 2    | 3    |
| Respondent 13 | 2    | 4    | 3    | 2    | 2    | 4    | 3    | 4    | 4    | 3    | 3    | 4    |
| Respondent 14 | 2    | 3    | 4    | 4    | 3    | 4    | 2    | 4    | 3    | 5    | 4    | 3    |
| Respondent 15 | 4    | 2    | 5    | 4    | 3    | 2    | 3    | 3    | 3    | 2    | 2    | 4    |
| Respondent 16 | 4    | 3    | 3    | 3    | 2    | 3    | 3    | 5    | 4    | 3    | 3    | 4    |
| Respondent 17 | 3    | 4    | 4    | 3    | 2    | 4    | 3    | 4    | 2    | 2    | 3    | 4    |
| Respondent 18 | 2    | 3    | 4    | 4    | 3    | 3    | 3    | 3    | 3    | 3    | 3    | 4    |
| Respondent 19 | 4    | 4    | 2    | 2    | 2    | 3    | 3    | 5    | 2    | 4    | 2    | 4    |
| Respondent 20 | 2    | 3    | 4    | 3    | 2    | 4    | 2    | 4    | 2    | 3    | 2    | 3    |
| Respondent 21 | 2    | 4    | 3    | 2    | 3    | 3    | 4    | 3    | 4    | 2    | 3    | 4    |
| Respondent 22 | 3    | 4    | 2    | 2    | 3    | 3    | 4    | 3    | 5    | 2    | 4    | 3    |
| Respondent 23 | 3    | 2    | 3    | 4    | 4    | 1    | 3    | 3    | 2    | 2    | 3    | 4    |
| Respondent 24 | 2    | 3    | 3    | 5    | 3    | 3    | 4    | 3    | 3    | 3    | 2    | 5    |
| Respondent 25 | 2    | 4    | 3    | 2    | 5    | 4    | 2    | 4    | 3    | 4    | 2    | 3    |
| Respondent 26 | 3    | 3    | 3    | 3    | 2    | 2    | 4    | 3    | 2    | 3    | 4    | 4    |
| Respondent 27 | 2    | 3    | 3    | 3    | 3    | 3    | 5    | 3    | 2    | 2    | 3    | 3    |
| Respondent 28 | 2    | 4    | 2    | 2    | 4    | 2    | 4    | 4    | 4    | 4    | 4    | 2    |
| Respondent 29 | 3    | 3    | 4    | 2    | 3    | 3    | 4    | 4    | 2    | 3    | 3    | 3    |
| Respondent 30 | 3    | 3    | 4    | 4    | 4    | 2    | 4    | 2    | 5    | 3    | 3    | 4    |
| Respondent 31 | 4    | 1    | 3    | 2    | 2    | 2    | 3    | 2    | 3    | 4    | 2    | 4    |
| Respondent 32 | 3    | 3    | 4    | 5    | 2    | 3    | 4    | 3    | 3    | 2    | 2    | 3    |
| Respondent 33 | 5    | 4    | 2    | 3    | 2    | 4    | 3    | 5    | 5    | 2    | 3    | 4    |
| Respondent 34 | 2    | 2    | 4    | 3    | 2    | 3    | 4    | 3    | 3    | 2    | 4    | 3    |
| Respondent 35 | 3    | 3    | 5    | 5    | 4    | 2    | 4    | 4    | 2    | 2    | 3    | 4    |
| Respondent 36 | 4    | 2    | 4    | 3    | 4    | 3    | 3    | 3    | 3    | 4    | 2    | 5    |
| Respondent 37 | 2    | 2    | 3    | 2    | 3    | 4    | 4    | 4    | 2    | 4    | 3    | 3    |
| Respondent 38 | 2    | 3    | 4    | 3    | 2    | 3    | 4    | 4    | 4    | 3    | 4    | 4    |
| Respondent 39 | 2    | 4    | 3    | 2    | 4    | 4    | 3    | 5    | 4    | 2    | 3    | 4    |
| Respondent 40 | 2    | 3    | 4    | 4    | 2    | 3    | 4    | 3    | 3    | 4    | 4    | 2    |
| Respondent 41 | 4    | 2    | 5    | 4    | 2    | 4    | 3    | 4    | 3    | 2    | 3    | 4    |
| Respondent 42 | 4    | 3    | 3    | 3    | 3    | 4    | 2    | 4    | 4    | 2    | 4    | 3    |
| Respondent 43 | 3    | 4    | 4    | 3    | 3    | 3    | 3    | 3    | 2    | 3    | 4    | 2    |
| Respondent 44 | 2    | 3    | 4    | 4    | 2    | 3    | 3    | 5    | 3    | 3    | 2    | 3    |
| Respondent 45 | 4    | 4    | 2    | 2    | 2    | 4    | 3    | 4    | 2    | 2    | 3    | 3    |
| Respondent 46 | 2    | 3    | 4    | 3    | 3    | 3    | 4    | 3    | 2    | 2    | 4    | 3    |
| Respondent 47 | 2    | 4    | 3    | 2    | 2    | 3    | 3    | 5    | 2    | 2    | 3    | 4    |
| Respondent 48 | 3    | 4    | 2    | 2    | 2    | 4    | 3    | 4    | 2    | 2    | 4    | 3    |
| Respondent 49 | 3    | 2    | 3    | 4    | 3    | 3    | 4    | 3    | 4    | 3    | 4    | 2    |
| Respondent 50 | 2    | 3    | 3    | 5    | 3    | 3    | 4    | 3    | 2    | 3    | 3    | 3    |
| Respondent 51 | 2    | 4    | 3    | 2    | 4    | 2    | 3    | 3    | 5    | 2    | 3    | 3    |

|                |   |   |   |   |   |   |   |   |   |   |   |   |
|----------------|---|---|---|---|---|---|---|---|---|---|---|---|
| Respondent 52  | 3 | 3 | 3 | 3 | 3 | 3 | 4 | 3 | 3 | 2 | 4 | 3 |
| Respondent 53  | 2 | 3 | 3 | 3 | 5 | 4 | 3 | 4 | 5 | 3 | 3 | 4 |
| Respondent 54  | 2 | 4 | 2 | 2 | 2 | 2 | 4 | 3 | 3 | 2 | 3 | 3 |
| Respondent 55  | 3 | 3 | 4 | 2 | 3 | 3 | 4 | 3 | 2 | 2 | 4 | 3 |
| Respondent 56  | 3 | 3 | 4 | 4 | 2 | 3 | 4 | 4 | 3 | 3 | 3 | 4 |
| Respondent 57  | 4 | 1 | 3 | 2 | 3 | 3 | 4 | 4 | 2 | 3 | 3 | 4 |
| Respondent 58  | 3 | 3 | 4 | 5 | 4 | 2 | 4 | 2 | 4 | 4 | 2 | 3 |
| Respondent 59  | 5 | 4 | 2 | 3 | 3 | 2 | 3 | 2 | 5 | 5 | 2 | 3 |
| Respondent 60  | 2 | 2 | 4 | 3 | 2 | 3 | 4 | 3 | 3 | 3 | 2 | 4 |
| Respondent 61  | 3 | 3 | 5 | 5 | 2 | 4 | 3 | 5 | 3 | 5 | 3 | 3 |
| Respondent 62  | 4 | 2 | 4 | 3 | 2 | 3 | 4 | 3 | 3 | 3 | 2 | 3 |
| Respondent 63  | 2 | 2 | 3 | 2 | 3 | 2 | 5 | 3 | 4 | 2 | 2 | 4 |
| Respondent 64  | 2 | 3 | 4 | 3 | 4 | 2 | 3 | 3 | 3 | 3 | 3 | 3 |
| Respondent 65  | 2 | 4 | 3 | 2 | 3 | 4 | 4 | 4 | 5 | 2 | 3 | 3 |
| Respondent 66  | 2 | 3 | 4 | 4 | 2 | 3 | 3 | 3 | 3 | 4 | 4 | 2 |
| Respondent 67  | 4 | 2 | 5 | 4 | 4 | 4 | 2 | 5 | 4 | 4 | 3 | 3 |
| Respondent 68  | 4 | 3 | 3 | 3 | 3 | 3 | 3 | 3 | 4 | 3 | 5 | 4 |
| Respondent 69  | 3 | 4 | 4 | 3 | 3 | 3 | 4 | 4 | 3 | 3 | 2 | 2 |
| Respondent 70  | 2 | 3 | 4 | 4 | 4 | 2 | 4 | 2 | 5 | 4 | 3 | 3 |
| Respondent 71  | 4 | 4 | 2 | 2 | 2 | 2 | 3 | 2 | 4 | 2 | 2 | 3 |
| Respondent 72  | 2 | 3 | 4 | 3 | 2 | 3 | 4 | 3 | 3 | 3 | 3 | 3 |
| Respondent 73  | 2 | 4 | 3 | 2 | 2 | 4 | 3 | 5 | 5 | 2 | 4 | 2 |
| Respondent 74  | 3 | 4 | 2 | 2 | 2 | 3 | 4 | 3 | 4 | 2 | 3 | 2 |
| Respondent 75  | 3 | 2 | 3 | 4 | 4 | 2 | 5 | 3 | 3 | 4 | 2 | 3 |
| Respondent 76  | 2 | 3 | 3 | 5 | 4 | 3 | 3 | 3 | 3 | 5 | 2 | 4 |
| Respondent 77  | 2 | 4 | 3 | 2 | 3 | 4 | 4 | 4 | 3 | 2 | 2 | 3 |
| Respondent 78  | 3 | 3 | 3 | 3 | 2 | 3 | 4 | 3 | 3 | 3 | 3 | 2 |
| Respondent 79  | 2 | 3 | 3 | 3 | 4 | 4 | 2 | 5 | 4 | 3 | 4 | 2 |
| Respondent 80  | 2 | 4 | 2 | 2 | 2 | 3 | 4 | 3 | 3 | 2 | 3 | 4 |
| Respondent 81  | 3 | 3 | 4 | 2 | 2 | 4 | 3 | 4 | 3 | 2 | 2 | 3 |
| Respondent 82  | 3 | 3 | 4 | 4 | 3 | 4 | 2 | 4 | 4 | 4 | 4 | 4 |
| Respondent 83  | 4 | 1 | 3 | 2 | 3 | 2 | 3 | 3 | 4 | 2 | 3 | 3 |
| Respondent 84  | 3 | 3 | 4 | 5 | 2 | 3 | 3 | 5 | 2 | 5 | 3 | 3 |
| Respondent 85  | 5 | 4 | 2 | 3 | 2 | 4 | 3 | 4 | 2 | 3 | 4 | 2 |
| Respondent 86  | 2 | 2 | 4 | 3 | 3 | 3 | 3 | 3 | 3 | 3 | 2 | 2 |
| Respondent 87  | 3 | 3 | 5 | 5 | 2 | 3 | 3 | 5 | 5 | 5 | 2 | 3 |
| Respondent 88  | 4 | 2 | 4 | 3 | 2 | 4 | 2 | 4 | 3 | 3 | 2 | 4 |
| Respondent 89  | 2 | 2 | 3 | 2 | 3 | 3 | 4 | 3 | 4 | 2 | 2 | 3 |
| Respondent 90  | 2 | 3 | 4 | 3 | 3 | 3 | 4 | 3 | 3 | 3 | 4 | 2 |
| Respondent 91  | 2 | 4 | 3 | 2 | 4 | 1 | 3 | 3 | 4 | 2 | 4 | 3 |
| Respondent 92  | 2 | 3 | 4 | 4 | 3 | 3 | 4 | 3 | 4 | 4 | 3 | 4 |
| Respondent 93  | 4 | 2 | 5 | 4 | 5 | 4 | 2 | 4 | 5 | 4 | 2 | 3 |
| Respondent 94  | 4 | 3 | 3 | 3 | 2 | 2 | 4 | 3 | 3 | 3 | 4 | 4 |
| Respondent 95  | 3 | 4 | 4 | 3 | 3 | 3 | 5 | 3 | 4 | 3 | 2 | 3 |
| Respondent 96  | 2 | 3 | 4 | 4 | 4 | 2 | 4 | 4 | 4 | 4 | 2 | 4 |
| Respondent 97  | 4 | 4 | 2 | 2 | 3 | 3 | 4 | 4 | 3 | 2 | 3 | 4 |
| Respondent 98  | 2 | 3 | 4 | 3 | 4 | 2 | 4 | 2 | 5 | 3 | 3 | 2 |
| Respondent 99  | 2 | 4 | 3 | 2 | 2 | 2 | 3 | 2 | 4 | 2 | 2 | 3 |
| Respondent 100 | 3 | 4 | 2 | 2 | 2 | 3 | 4 | 3 | 3 | 2 | 2 | 4 |
| Respondent 101 | 3 | 2 | 3 | 4 | 2 | 4 | 3 | 5 | 5 | 2 | 2 | 3 |
| Respondent 102 | 2 | 3 | 3 | 5 | 2 | 3 | 4 | 3 | 4 | 2 | 2 | 4 |
| Respondent 103 | 2 | 4 | 3 | 2 | 4 | 2 | 4 | 4 | 3 | 4 | 3 | 4 |
| Respondent 104 | 3 | 3 | 3 | 3 | 4 | 3 | 3 | 3 | 3 | 2 | 3 | 3 |
| Respondent 105 | 2 | 3 | 3 | 3 | 3 | 4 | 4 | 4 | 3 | 5 | 2 | 3 |

|                |   |   |   |   |   |   |   |   |   |   |   |   |
|----------------|---|---|---|---|---|---|---|---|---|---|---|---|
| Respondent 106 | 2 | 4 | 2 | 2 | 2 | 3 | 4 | 4 | 3 | 3 | 2 | 4 |
| Respondent 107 | 3 | 3 | 4 | 2 | 4 | 4 | 3 | 5 | 4 | 5 | 3 | 3 |
| Respondent 108 | 3 | 3 | 4 | 4 | 2 | 3 | 4 | 3 | 3 | 3 | 2 | 3 |
| Respondent 109 | 4 | 1 | 3 | 2 | 2 | 4 | 3 | 4 | 3 | 2 | 2 | 4 |
| Respondent 110 | 3 | 3 | 4 | 5 | 3 | 4 | 2 | 4 | 4 | 3 | 3 | 3 |
| Respondent 111 | 5 | 4 | 2 | 3 | 3 | 3 | 3 | 3 | 4 | 2 | 3 | 3 |
| Respondent 112 | 2 | 2 | 4 | 3 | 2 | 3 | 3 | 5 | 2 | 4 | 4 | 2 |
| Respondent 113 | 4 | 2 | 4 | 3 | 2 | 4 | 3 | 4 | 5 | 5 | 2 | 3 |
| Respondent 114 | 2 | 2 | 3 | 2 | 3 | 3 | 4 | 3 | 3 | 3 | 2 | 4 |
| Respondent 115 | 2 | 3 | 4 | 3 | 2 | 3 | 3 | 5 | 3 | 5 | 3 | 3 |
| Respondent 116 | 2 | 4 | 3 | 2 | 2 | 4 | 3 | 4 | 3 | 3 | 2 | 3 |
| Respondent 117 | 2 | 3 | 4 | 4 | 3 | 3 | 4 | 3 | 4 | 2 | 2 | 4 |
| Respondent 118 | 4 | 2 | 5 | 4 | 3 | 3 | 4 | 3 | 3 | 3 | 3 | 3 |
| Respondent 119 | 4 | 3 | 3 | 3 | 4 | 2 | 3 | 3 | 5 | 2 | 3 | 3 |
| Respondent 120 | 3 | 4 | 4 | 3 | 3 | 3 | 4 | 3 | 3 | 4 | 4 | 2 |
| Respondent 121 | 2 | 3 | 4 | 4 | 5 | 4 | 3 | 4 | 4 | 4 | 3 | 3 |
| Respondent 122 | 4 | 4 | 2 | 2 | 2 | 2 | 4 | 3 | 4 | 3 | 5 | 4 |
| Respondent 123 | 2 | 3 | 4 | 3 | 3 | 3 | 4 | 3 | 3 | 3 | 2 | 2 |
| Respondent 124 | 2 | 4 | 3 | 2 | 2 | 3 | 4 | 4 | 5 | 4 | 3 | 3 |
| Respondent 125 | 3 | 4 | 2 | 2 | 3 | 3 | 4 | 4 | 4 | 2 | 2 | 3 |
| Respondent 126 | 3 | 2 | 3 | 4 | 4 | 2 | 4 | 2 | 3 | 3 | 3 | 3 |
| Respondent 127 | 2 | 3 | 3 | 5 | 3 | 2 | 3 | 2 | 5 | 2 | 4 | 2 |
| Respondent 128 | 2 | 4 | 3 | 2 | 2 | 3 | 4 | 3 | 4 | 2 | 3 | 2 |
| Respondent 129 | 3 | 3 | 3 | 3 | 2 | 4 | 3 | 5 | 3 | 4 | 2 | 3 |
| Respondent 130 | 2 | 3 | 3 | 3 | 2 | 3 | 4 | 3 | 3 | 5 | 2 | 4 |
| Respondent 131 | 2 | 4 | 2 | 2 | 3 | 2 | 5 | 3 | 3 | 2 | 2 | 3 |
| Respondent 132 | 3 | 3 | 4 | 2 | 4 | 2 | 3 | 3 | 3 | 3 | 3 | 2 |
| Respondent 133 | 3 | 3 | 4 | 4 | 3 | 4 | 4 | 4 | 4 | 3 | 4 | 2 |
| Respondent 134 | 4 | 1 | 3 | 2 | 2 | 3 | 3 | 3 | 3 | 2 | 3 | 4 |
| Respondent 135 | 3 | 3 | 4 | 5 | 4 | 4 | 2 | 5 | 3 | 2 | 2 | 3 |
| Respondent 136 | 5 | 4 | 2 | 3 | 3 | 3 | 3 | 3 | 4 | 4 | 4 | 4 |
| Respondent 137 | 2 | 2 | 4 | 3 | 3 | 3 | 4 | 4 | 4 | 2 | 3 | 3 |
| Respondent 138 | 3 | 3 | 5 | 5 | 4 | 2 | 4 | 2 | 2 | 5 | 3 | 3 |
| Respondent 139 | 4 | 2 | 4 | 3 | 2 | 2 | 3 | 2 | 2 | 3 | 4 | 2 |
| Respondent 140 | 2 | 2 | 3 | 2 | 2 | 3 | 4 | 3 | 3 | 3 | 2 | 2 |
| Respondent 141 | 2 | 3 | 4 | 3 | 2 | 4 | 3 | 5 | 5 | 5 | 2 | 3 |
| Respondent 142 | 2 | 4 | 3 | 2 | 2 | 3 | 4 | 3 | 3 | 3 | 2 | 4 |
| Respondent 143 | 2 | 3 | 4 | 4 | 4 | 2 | 5 | 3 | 4 | 2 | 2 | 3 |
| Respondent 144 | 4 | 2 | 5 | 4 | 4 | 3 | 3 | 3 | 3 | 3 | 4 | 2 |
| Respondent 145 | 4 | 3 | 3 | 3 | 3 | 4 | 4 | 4 | 4 | 2 | 4 | 3 |
| Respondent 146 | 3 | 4 | 4 | 3 | 2 | 3 | 4 | 3 | 4 | 4 | 3 | 4 |
| Respondent 147 | 2 | 3 | 4 | 4 | 4 | 4 | 2 | 5 | 5 | 4 | 2 | 3 |
| Respondent 148 | 4 | 4 | 2 | 2 | 2 | 3 | 4 | 3 | 3 | 3 | 4 | 4 |
| Respondent 149 | 2 | 3 | 4 | 3 | 2 | 4 | 3 | 4 | 4 | 3 | 2 | 3 |
| Respondent 150 | 2 | 4 | 3 | 2 | 3 | 4 | 2 | 4 | 4 | 4 | 2 | 4 |
| Respondent 151 | 3 | 4 | 2 | 2 | 3 | 2 | 3 | 3 | 3 | 2 | 3 | 4 |
| Respondent 152 | 3 | 2 | 3 | 4 | 2 | 3 | 3 | 5 | 5 | 3 | 3 | 2 |
| Respondent 153 | 3 | 3 | 3 | 3 | 2 | 4 | 3 | 4 | 4 | 2 | 2 | 3 |
| Respondent 154 | 2 | 3 | 3 | 3 | 3 | 3 | 3 | 3 | 3 | 2 | 2 | 4 |
| Respondent 155 | 2 | 4 | 2 | 2 | 2 | 3 | 3 | 5 | 5 | 2 | 2 | 3 |
| Respondent 156 | 3 | 3 | 4 | 2 | 2 | 4 | 2 | 4 | 4 | 2 | 2 | 4 |
| Respondent 157 | 3 | 3 | 4 | 4 | 3 | 3 | 4 | 3 | 3 | 4 | 3 | 4 |
| Respondent 158 | 3 | 2 | 3 | 2 | 3 | 3 | 4 | 3 | 3 | 2 | 3 | 3 |
| Respondent 159 | 3 | 3 | 4 | 5 | 4 | 1 | 3 | 3 | 3 | 5 | 2 | 3 |

|                |   |   |   |   |   |   |   |   |   |   |   |   |
|----------------|---|---|---|---|---|---|---|---|---|---|---|---|
| Respondent 160 | 4 | 2 | 4 | 3 | 3 | 3 | 4 | 3 | 3 | 3 | 2 | 4 |
| Respondent 161 | 3 | 3 | 4 | 5 | 5 | 4 | 2 | 4 | 4 | 5 | 3 | 3 |
| Respondent 162 | 4 | 2 | 4 | 3 | 2 | 2 | 4 | 3 | 3 | 3 | 2 | 3 |
| Respondent 163 | 2 | 2 | 3 | 2 | 3 | 3 | 5 | 3 | 3 | 2 | 2 | 4 |
| Respondent 164 | 2 | 3 | 4 | 3 | 4 | 2 | 4 | 4 | 4 | 3 | 3 | 3 |
| Respondent 165 | 2 | 4 | 3 | 2 | 3 | 3 | 4 | 4 | 4 | 2 | 3 | 3 |
| Respondent 166 | 2 | 3 | 4 | 4 | 4 | 2 | 4 | 2 | 2 | 4 | 4 | 2 |
| Respondent 167 | 4 | 2 | 5 | 4 | 2 | 2 | 3 | 2 | 4 | 2 | 5 | 3 |
| Respondent 168 | 4 | 3 | 3 | 3 | 2 | 3 | 4 | 3 | 3 | 3 | 3 | 4 |
| Respondent 169 | 3 | 4 | 4 | 3 | 2 | 4 | 3 | 5 | 3 | 4 | 4 | 4 |
| Respondent 170 | 2 | 3 | 4 | 4 | 2 | 3 | 4 | 3 | 2 | 4 | 2 | 2 |
| Respondent 171 | 4 | 4 | 2 | 2 | 4 | 2 | 4 | 4 | 2 | 3 | 2 | 2 |
| Respondent 172 | 2 | 3 | 4 | 3 | 4 | 3 | 3 | 3 | 3 | 4 | 3 | 3 |
| Respondent 173 | 2 | 4 | 3 | 2 | 3 | 4 | 4 | 4 | 4 | 3 | 5 | 5 |
| Respondent 174 | 3 | 4 | 2 | 2 | 2 | 3 | 4 | 4 | 3 | 4 | 3 | 3 |
| Respondent 175 | 3 | 2 | 3 | 4 | 4 | 4 | 3 | 5 | 2 | 5 | 3 | 4 |
| Respondent 176 | 2 | 3 | 3 | 5 | 2 | 3 | 4 | 3 | 3 | 3 | 3 | 3 |
| Respondent 177 | 2 | 4 | 3 | 2 | 2 | 4 | 3 | 4 | 4 | 4 | 4 | 4 |
| Respondent 178 | 3 | 3 | 3 | 3 | 3 | 4 | 2 | 4 | 3 | 4 | 3 | 4 |
| Respondent 179 | 2 | 3 | 3 | 3 | 3 | 3 | 3 | 3 | 4 | 2 | 5 | 5 |
| Respondent 180 | 2 | 4 | 2 | 2 | 2 | 3 | 3 | 5 | 3 | 4 | 3 | 3 |
| Respondent 181 | 3 | 3 | 4 | 2 | 2 | 4 | 3 | 4 | 4 | 3 | 4 | 4 |
| Respondent 182 | 3 | 3 | 4 | 4 | 3 | 3 | 4 | 3 | 4 | 2 | 4 | 4 |
| Respondent 183 | 4 | 1 | 3 | 2 | 2 | 3 | 3 | 5 | 2 | 3 | 3 | 3 |
| Respondent 184 | 3 | 3 | 4 | 5 | 2 | 4 | 3 | 4 | 3 | 3 | 5 | 5 |
| Respondent 185 | 5 | 4 | 2 | 3 | 3 | 3 | 4 | 3 | 4 | 3 | 4 | 4 |
| Respondent 186 | 2 | 2 | 4 | 3 | 3 | 3 | 4 | 3 | 3 | 3 | 3 | 3 |
| Respondent 187 | 3 | 3 | 5 | 5 | 4 | 2 | 3 | 3 | 3 | 3 | 5 | 5 |
| Respondent 188 | 4 | 2 | 4 | 3 | 3 | 3 | 4 | 3 | 4 | 2 | 4 | 4 |
| Respondent 189 | 2 | 2 | 3 | 2 | 5 | 4 | 3 | 4 | 3 | 4 | 3 | 3 |
| Respondent 190 | 2 | 3 | 4 | 3 | 2 | 2 | 4 | 3 | 3 | 4 | 3 | 3 |
| Respondent 191 | 2 | 4 | 3 | 2 | 3 | 3 | 4 | 3 | 1 | 3 | 3 | 3 |
| Respondent 192 | 2 | 3 | 4 | 4 | 2 | 3 | 4 | 4 | 3 | 4 | 3 | 3 |
| Respondent 193 | 4 | 2 | 5 | 4 | 3 | 3 | 4 | 4 | 4 | 2 | 4 | 4 |
| Respondent 194 | 4 | 3 | 3 | 3 | 4 | 2 | 4 | 2 | 2 | 4 | 3 | 3 |
| Respondent 195 | 3 | 4 | 4 | 3 | 3 | 2 | 3 | 2 | 3 | 5 | 3 | 3 |
| Respondent 196 | 2 | 3 | 4 | 4 | 2 | 3 | 4 | 3 | 2 | 4 | 4 | 4 |
| Respondent 197 | 4 | 4 | 2 | 2 | 2 | 4 | 3 | 5 | 3 | 4 | 4 | 4 |
| Respondent 198 | 2 | 3 | 4 | 3 | 2 | 3 | 4 | 3 | 2 | 4 | 2 | 2 |
| Respondent 199 | 2 | 4 | 3 | 2 | 3 | 2 | 5 | 3 | 4 | 2 | 5 | 3 |
| Respondent 200 | 3 | 4 | 2 | 2 | 4 | 2 | 3 | 3 | 3 | 3 | 3 | 4 |
| Respondent 201 | 3 | 2 | 3 | 4 | 3 | 4 | 4 | 4 | 3 | 4 | 4 | 4 |
| Respondent 202 | 2 | 3 | 3 | 5 | 2 | 3 | 3 | 3 | 2 | 4 | 2 | 2 |
| Respondent 203 | 2 | 4 | 3 | 2 | 4 | 4 | 2 | 5 | 2 | 3 | 2 | 2 |
| Respondent 204 | 3 | 3 | 3 | 3 | 3 | 3 | 3 | 3 | 3 | 4 | 3 | 3 |
| Respondent 205 | 2 | 3 | 3 | 3 | 3 | 3 | 4 | 4 | 4 | 3 | 5 | 5 |
| Respondent 206 | 2 | 4 | 2 | 2 | 4 | 2 | 4 | 2 | 3 | 4 | 3 | 3 |
| Respondent 207 | 3 | 3 | 4 | 2 | 2 | 2 | 3 | 2 | 2 | 5 | 3 | 4 |
| Respondent 208 | 3 | 3 | 4 | 4 | 2 | 3 | 4 | 3 | 3 | 3 | 3 | 3 |
| Respondent 209 | 3 | 2 | 3 | 2 | 2 | 4 | 3 | 5 | 4 | 4 | 4 | 4 |
| Respondent 210 | 3 | 3 | 4 | 5 | 2 | 3 | 4 | 3 | 3 | 4 | 3 | 4 |
| Respondent 211 | 4 | 2 | 4 | 3 | 4 | 2 | 5 | 3 | 4 | 2 | 5 | 5 |
| Respondent 212 | 2 | 2 | 3 | 2 | 4 | 3 | 3 | 3 | 3 | 4 | 3 | 3 |
| Respondent 213 | 2 | 3 | 4 | 3 | 3 | 4 | 4 | 4 | 4 | 3 | 4 | 4 |

|                |   |   |   |   |   |   |   |   |   |   |   |   |
|----------------|---|---|---|---|---|---|---|---|---|---|---|---|
| Respondent 214 | 2 | 4 | 3 | 2 | 2 | 3 | 4 | 3 | 4 | 2 | 4 | 4 |
| Respondent 215 | 3 | 2 | 3 | 4 | 4 | 4 | 2 | 5 | 2 | 3 | 3 | 3 |
| Respondent 216 | 4 | 2 | 5 | 4 | 2 | 3 | 4 | 3 | 3 | 3 | 5 | 5 |
| Respondent 217 | 4 | 3 | 3 | 3 | 2 | 4 | 3 | 4 | 4 | 3 | 4 | 4 |
| Respondent 218 | 3 | 4 | 4 | 3 | 3 | 4 | 2 | 4 | 3 | 3 | 3 | 3 |
| Respondent 219 | 2 | 3 | 4 | 4 | 3 | 2 | 3 | 3 | 3 | 3 | 5 | 5 |
| Respondent 220 | 4 | 4 | 2 | 2 | 2 | 3 | 3 | 5 | 4 | 2 | 4 | 4 |
| Respondent 221 | 2 | 3 | 4 | 3 | 2 | 4 | 3 | 4 | 3 | 4 | 3 | 4 |
| Respondent 222 | 2 | 4 | 3 | 2 | 3 | 3 | 3 | 3 | 3 | 4 | 3 | 3 |
| Respondent 223 | 3 | 4 | 2 | 2 | 2 | 3 | 3 | 5 | 1 | 3 | 3 | 3 |
| Respondent 224 | 3 | 2 | 3 | 4 | 2 | 4 | 2 | 4 | 3 | 4 | 3 | 4 |
| Respondent 225 | 2 | 3 | 3 | 5 | 3 | 3 | 4 | 3 | 4 | 2 | 4 | 4 |
| Respondent 226 | 2 | 4 | 3 | 2 | 3 | 3 | 4 | 3 | 2 | 4 | 3 | 3 |
| Respondent 227 | 3 | 3 | 3 | 3 | 4 | 1 | 3 | 3 | 3 | 5 | 3 | 3 |
| Respondent 228 | 4 | 2 | 4 | 3 | 3 | 3 | 4 | 3 | 2 | 4 | 4 | 4 |
| Respondent 229 | 2 | 2 | 3 | 2 | 5 | 4 | 2 | 4 | 3 | 4 | 4 | 4 |
| Respondent 230 | 2 | 3 | 4 | 3 | 2 | 2 | 4 | 3 | 2 | 4 | 2 | 2 |
| Respondent 231 | 2 | 4 | 3 | 2 | 3 | 3 | 5 | 3 | 4 | 2 | 5 | 3 |
| Respondent 232 | 2 | 3 | 4 | 4 | 4 | 2 | 4 | 4 | 3 | 3 | 3 | 4 |
| Respondent 233 | 4 | 2 | 5 | 4 | 3 | 3 | 4 | 4 | 3 | 4 | 4 | 4 |
| Respondent 234 | 4 | 3 | 3 | 3 | 4 | 2 | 4 | 2 | 2 | 4 | 2 | 2 |
| Respondent 235 | 3 | 4 | 4 | 3 | 2 | 2 | 3 | 2 | 2 | 3 | 2 | 2 |
| Respondent 236 | 2 | 3 | 4 | 4 | 2 | 3 | 4 | 3 | 3 | 4 | 3 | 3 |
| Respondent 237 | 4 | 4 | 2 | 2 | 2 | 4 | 3 | 5 | 4 | 3 | 5 | 5 |
| Respondent 238 | 2 | 3 | 4 | 3 | 2 | 3 | 4 | 3 | 3 | 4 | 3 | 3 |
| Respondent 239 | 2 | 4 | 3 | 2 | 4 | 2 | 4 | 4 | 2 | 5 | 3 | 4 |
| Respondent 240 | 3 | 4 | 2 | 2 | 4 | 3 | 3 | 3 | 3 | 3 | 3 | 3 |
| Respondent 241 | 3 | 2 | 3 | 4 | 3 | 4 | 4 | 4 | 4 | 4 | 4 | 4 |
| Respondent 242 | 3 | 3 | 3 | 3 | 2 | 3 | 4 | 4 | 3 | 4 | 3 | 4 |
| Respondent 243 | 2 | 3 | 3 | 3 | 4 | 4 | 3 | 5 | 4 | 2 | 5 | 5 |
| Respondent 244 | 2 | 4 | 2 | 2 | 2 | 3 | 4 | 3 | 3 | 4 | 3 | 3 |
| Respondent 245 | 3 | 3 | 4 | 2 | 2 | 4 | 3 | 4 | 4 | 3 | 4 | 4 |
| Respondent 246 | 3 | 3 | 4 | 4 | 3 | 4 | 2 | 4 | 4 | 2 | 4 | 4 |
| Respondent 247 | 3 | 2 | 3 | 2 | 3 | 3 | 3 | 3 | 2 | 3 | 3 | 3 |
| Respondent 248 | 3 | 3 | 4 | 5 | 2 | 3 | 3 | 5 | 3 | 3 | 5 | 5 |
| Respondent 249 | 4 | 2 | 4 | 3 | 2 | 4 | 3 | 4 | 4 | 3 | 4 | 4 |
| Respondent 250 | 3 | 3 | 4 | 5 | 3 | 3 | 4 | 3 | 3 | 3 | 3 | 3 |
| Respondent 251 | 4 | 2 | 4 | 3 | 2 | 3 | 3 | 5 | 3 | 3 | 5 | 5 |
| Respondent 252 | 2 | 2 | 3 | 2 | 2 | 4 | 3 | 4 | 4 | 2 | 4 | 4 |
| Respondent 253 | 2 | 3 | 4 | 3 | 3 | 3 | 4 | 3 | 3 | 4 | 3 | 3 |
| Respondent 254 | 2 | 4 | 3 | 2 | 3 | 3 | 4 | 3 | 3 | 4 | 3 | 3 |
| Respondent 255 | 2 | 3 | 4 | 4 | 4 | 2 | 3 | 3 | 1 | 3 | 3 | 3 |
| Respondent 256 | 4 | 2 | 5 | 4 | 3 | 3 | 4 | 3 | 3 | 4 | 3 | 3 |
| Respondent 257 | 4 | 3 | 3 | 3 | 5 | 4 | 3 | 4 | 4 | 2 | 4 | 4 |
| Respondent 258 | 3 | 4 | 4 | 3 | 2 | 2 | 4 | 3 | 2 | 4 | 3 | 3 |
| Respondent 259 | 2 | 3 | 4 | 4 | 3 | 3 | 4 | 3 | 3 | 5 | 3 | 3 |
| Respondent 260 | 4 | 4 | 2 | 2 | 2 | 3 | 4 | 4 | 2 | 4 | 4 | 4 |
| Respondent 261 | 2 | 3 | 4 | 3 | 3 | 3 | 4 | 4 | 3 | 4 | 4 | 4 |
| Respondent 262 | 2 | 4 | 3 | 2 | 4 | 2 | 4 | 2 | 2 | 4 | 2 | 2 |
| Respondent 263 | 3 | 4 | 2 | 2 | 3 | 2 | 3 | 2 | 4 | 2 | 5 | 3 |
| Respondent 264 | 3 | 2 | 3 | 4 | 2 | 3 | 4 | 3 | 3 | 3 | 3 | 4 |
| Respondent 265 | 2 | 3 | 3 | 5 | 2 | 4 | 3 | 5 | 3 | 4 | 4 | 4 |
| Respondent 266 | 2 | 4 | 3 | 2 | 2 | 3 | 4 | 3 | 2 | 4 | 2 | 3 |
| Respondent 267 | 3 | 3 | 3 | 3 | 3 | 2 | 5 | 3 | 2 | 3 | 2 | 2 |

|                |   |   |   |   |   |   |   |   |   |   |   |   |
|----------------|---|---|---|---|---|---|---|---|---|---|---|---|
| Respondent 268 | 2 | 3 | 3 | 3 | 4 | 2 | 3 | 3 | 3 | 4 | 3 | 3 |
| Respondent 269 | 2 | 4 | 2 | 2 | 3 | 4 | 4 | 4 | 4 | 3 | 5 | 5 |
| Respondent 270 | 3 | 3 | 4 | 2 | 2 | 3 | 3 | 3 | 3 | 4 | 3 | 3 |
| Respondent 271 | 3 | 3 | 4 | 4 | 4 | 4 | 2 | 5 | 2 | 5 | 3 | 4 |
| Respondent 272 | 4 | 1 | 3 | 2 | 3 | 3 | 3 | 3 | 4 | 4 | 4 | 4 |
| Respondent 273 | 3 | 3 | 4 | 5 | 3 | 3 | 4 | 4 | 4 | 3 | 4 | 3 |
| Respondent 274 | 5 | 4 | 2 | 3 | 4 | 2 | 4 | 2 | 5 | 4 | 2 | 5 |
| Respondent 275 | 2 | 2 | 4 | 3 | 2 | 2 | 3 | 2 | 3 | 3 | 4 | 3 |
| Respondent 276 | 3 | 3 | 5 | 5 | 2 | 3 | 4 | 3 | 4 | 4 | 3 | 4 |
| Respondent 277 | 4 | 2 | 4 | 3 | 2 | 4 | 3 | 5 | 4 | 4 | 2 | 4 |
| Respondent 278 | 2 | 2 | 3 | 2 | 2 | 3 | 4 | 3 | 3 | 2 | 3 | 3 |
| Respondent 279 | 2 | 3 | 4 | 3 | 4 | 2 | 5 | 3 | 5 | 3 | 3 | 5 |
| Respondent 280 | 2 | 4 | 3 | 2 | 4 | 3 | 3 | 3 | 4 | 4 | 3 | 4 |
| Respondent 281 | 2 | 3 | 4 | 4 | 3 | 4 | 4 | 4 | 3 | 3 | 3 | 3 |
| Respondent 282 | 4 | 2 | 5 | 4 | 2 | 3 | 4 | 3 | 5 | 3 | 3 | 5 |
| Respondent 283 | 4 | 3 | 3 | 3 | 4 | 4 | 2 | 5 | 4 | 4 | 2 | 4 |
| Respondent 284 | 3 | 4 | 4 | 3 | 2 | 3 | 4 | 3 | 3 | 3 | 4 | 3 |
| Respondent 285 | 2 | 3 | 4 | 4 | 2 | 4 | 3 | 4 | 3 | 3 | 4 | 3 |
| Respondent 286 | 4 | 4 | 2 | 2 | 3 | 4 | 2 | 4 | 3 | 1 | 3 | 3 |
| Respondent 287 | 2 | 3 | 4 | 3 | 3 | 2 | 3 | 3 | 3 | 3 | 4 | 3 |
| Respondent 288 | 2 | 4 | 3 | 2 | 2 | 3 | 3 | 5 | 4 | 4 | 2 | 4 |
| Respondent 289 | 3 | 4 | 2 | 2 | 2 | 4 | 3 | 4 | 3 | 2 | 4 | 3 |
| Respondent 290 | 3 | 2 | 3 | 4 | 3 | 3 | 3 | 3 | 3 | 3 | 5 | 3 |
| Respondent 291 | 2 | 3 | 3 | 5 | 2 | 3 | 3 | 5 | 4 | 2 | 4 | 4 |
| Respondent 292 | 2 | 4 | 3 | 2 | 2 | 4 | 2 | 4 | 4 | 3 | 4 | 4 |
| Respondent 293 | 3 | 3 | 3 | 3 | 3 | 3 | 4 | 3 | 2 | 2 | 4 | 4 |
| Respondent 294 | 2 | 3 | 3 | 3 | 3 | 3 | 4 | 3 | 2 | 4 | 2 | 5 |
| Respondent 295 | 2 | 4 | 2 | 2 | 4 | 3 | 3 | 3 | 3 | 3 | 3 | 3 |
| Respondent 296 | 3 | 3 | 4 | 2 | 3 | 3 | 4 | 3 | 5 | 3 | 4 | 4 |
| Respondent 297 | 3 | 3 | 4 | 4 | 5 | 4 | 2 | 4 | 3 | 2 | 4 | 2 |
| Respondent 298 | 3 | 2 | 3 | 2 | 2 | 2 | 4 | 3 | 3 | 2 | 3 | 2 |
| Respondent 299 | 3 | 3 | 4 | 5 | 3 | 3 | 5 | 3 | 3 | 3 | 4 | 3 |
| Respondent 300 | 4 | 2 | 4 | 3 | 4 | 2 | 4 | 4 | 4 | 4 | 3 | 5 |
| Respondent 301 | 2 | 2 | 3 | 2 | 3 | 3 | 4 | 4 | 3 | 3 | 4 | 4 |
| Respondent 302 | 2 | 3 | 4 | 3 | 4 | 2 | 4 | 2 | 5 | 2 | 5 | 3 |
| Respondent 303 | 2 | 4 | 3 | 2 | 2 | 2 | 3 | 2 | 4 | 4 | 4 | 4 |
| Respondent 304 | 3 | 2 | 3 | 4 | 2 | 3 | 4 | 3 | 4 | 3 | 4 | 3 |
| Respondent 305 | 4 | 2 | 5 | 4 | 2 | 4 | 3 | 5 | 5 | 4 | 2 | 5 |
| Respondent 306 | 4 | 3 | 3 | 3 | 2 | 3 | 4 | 3 | 3 | 3 | 4 | 3 |
| Respondent 307 | 3 | 4 | 4 | 3 | 4 | 2 | 4 | 4 | 4 | 4 | 3 | 4 |
| Respondent 308 | 4 | 2 | 4 | 3 | 4 | 3 | 3 | 3 | 4 | 4 | 2 | 4 |
| Respondent 309 | 2 | 2 | 3 | 2 | 3 | 4 | 4 | 4 | 3 | 2 | 3 | 3 |
| Respondent 310 | 2 | 3 | 4 | 3 | 2 | 3 | 4 | 4 | 5 | 3 | 3 | 5 |
| Respondent 311 | 2 | 4 | 3 | 2 | 4 | 4 | 3 | 5 | 4 | 4 | 3 | 4 |
| Respondent 312 | 2 | 3 | 4 | 4 | 2 | 3 | 4 | 3 | 3 | 3 | 3 | 3 |
| Respondent 313 | 4 | 2 | 5 | 4 | 2 | 4 | 3 | 4 | 5 | 3 | 3 | 5 |
| Respondent 314 | 4 | 3 | 3 | 3 | 3 | 4 | 2 | 4 | 4 | 4 | 2 | 4 |
| Respondent 315 | 3 | 4 | 4 | 3 | 3 | 3 | 3 | 3 | 3 | 3 | 4 | 3 |
| Respondent 316 | 2 | 3 | 4 | 4 | 2 | 3 | 3 | 5 | 3 | 3 | 4 | 4 |
| Respondent 317 | 4 | 4 | 2 | 2 | 2 | 4 | 3 | 4 | 3 | 1 | 3 | 3 |
| Respondent 318 | 2 | 3 | 4 | 3 | 3 | 3 | 4 | 3 | 3 | 3 | 4 | 3 |
| Respondent 319 | 2 | 4 | 3 | 2 | 2 | 3 | 3 | 5 | 4 | 4 | 2 | 4 |
| Respondent 320 | 3 | 4 | 2 | 2 | 2 | 4 | 3 | 4 | 3 | 2 | 4 | 3 |
| Respondent 321 | 3 | 2 | 3 | 4 | 3 | 3 | 4 | 3 | 3 | 3 | 5 | 3 |

|                |   |   |   |   |   |   |   |   |   |   |   |   |
|----------------|---|---|---|---|---|---|---|---|---|---|---|---|
| Respondent 322 | 3 | 3 | 3 | 3 | 3 | 3 | 4 | 3 | 4 | 2 | 4 | 4 |
| Respondent 323 | 2 | 3 | 3 | 3 | 4 | 2 | 3 | 3 | 4 | 3 | 4 | 4 |
| Respondent 324 | 2 | 4 | 2 | 2 | 3 | 3 | 4 | 3 | 2 | 2 | 4 | 2 |
| Respondent 325 | 3 | 3 | 4 | 2 | 5 | 4 | 3 | 4 | 2 | 4 | 2 | 5 |
| Respondent 326 | 3 | 3 | 4 | 4 | 2 | 2 | 4 | 3 | 3 | 3 | 3 | 3 |
| Respondent 327 | 3 | 2 | 3 | 2 | 3 | 3 | 4 | 3 | 5 | 3 | 4 | 4 |
| Respondent 328 | 3 | 3 | 4 | 5 | 2 | 3 | 4 | 4 | 3 | 2 | 4 | 2 |
| Respondent 329 | 4 | 2 | 4 | 3 | 3 | 3 | 4 | 4 | 3 | 2 | 3 | 5 |
| Respondent 330 | 3 | 3 | 4 | 5 | 4 | 2 | 4 | 2 | 3 | 3 | 4 | 3 |
| Respondent 331 | 4 | 2 | 4 | 3 | 3 | 2 | 3 | 2 | 4 | 4 | 3 | 5 |
| Respondent 332 | 2 | 2 | 3 | 2 | 2 | 3 | 4 | 3 | 3 | 3 | 4 | 3 |
| Respondent 333 | 2 | 3 | 4 | 3 | 2 | 4 | 3 | 5 | 5 | 2 | 5 | 3 |
| Respondent 334 | 2 | 4 | 3 | 2 | 2 | 3 | 4 | 3 | 3 | 4 | 4 | 4 |
| Respondent 335 | 2 | 3 | 4 | 4 | 3 | 2 | 5 | 3 | 4 | 4 | 3 | 4 |
| Respondent 336 | 4 | 2 | 5 | 4 | 4 | 2 | 3 | 3 | 2 | 5 | 4 | 2 |
| Respondent 337 | 4 | 3 | 3 | 3 | 3 | 4 | 4 | 4 | 2 | 3 | 3 | 4 |
| Respondent 338 | 3 | 4 | 4 | 3 | 2 | 3 | 3 | 3 | 3 | 4 | 4 | 3 |
| Respondent 339 | 2 | 3 | 4 | 4 | 4 | 4 | 2 | 5 | 5 | 4 | 4 | 4 |
| Respondent 340 | 4 | 4 | 2 | 2 | 3 | 3 | 3 | 3 | 3 | 3 | 2 | 5 |
| Respondent 341 | 2 | 3 | 4 | 3 | 3 | 3 | 4 | 4 | 3 | 5 | 3 | 5 |
| Respondent 342 | 2 | 4 | 3 | 2 | 4 | 2 | 4 | 2 | 3 | 4 | 4 | 5 |
| Respondent 343 | 3 | 4 | 2 | 2 | 2 | 2 | 3 | 2 | 4 | 3 | 3 | 3 |
| Respondent 344 | 3 | 2 | 3 | 4 | 2 | 3 | 4 | 3 | 3 | 5 | 3 | 3 |
| Respondent 345 | 2 | 3 | 3 | 5 | 2 | 4 | 3 | 5 | 5 | 4 | 4 | 2 |
| Respondent 346 | 2 | 4 | 3 | 2 | 2 | 3 | 4 | 3 | 3 | 3 | 3 | 4 |
| Respondent 347 | 3 | 3 | 3 | 3 | 4 | 2 | 5 | 3 | 4 | 3 | 3 | 4 |
| Respondent 348 | 2 | 3 | 3 | 3 | 4 | 3 | 3 | 3 | 4 | 3 | 1 | 3 |
| Respondent 349 | 2 | 4 | 2 | 2 | 3 | 4 | 4 | 4 | 3 | 3 | 3 | 4 |
| Respondent 350 | 3 | 3 | 4 | 2 | 2 | 3 | 4 | 3 | 5 | 4 | 4 | 2 |
| Respondent 351 | 3 | 3 | 4 | 4 | 4 | 4 | 2 | 5 | 4 | 3 | 2 | 4 |
| Respondent 352 | 4 | 1 | 3 | 2 | 2 | 3 | 4 | 3 | 3 | 3 | 3 | 5 |
| Respondent 353 | 3 | 3 | 4 | 5 | 2 | 4 | 3 | 4 | 5 | 4 | 2 | 4 |
| Respondent 354 | 5 | 4 | 2 | 3 | 3 | 4 | 2 | 4 | 4 | 4 | 3 | 4 |
| Respondent 355 | 2 | 2 | 4 | 3 | 3 | 2 | 3 | 3 | 3 | 2 | 2 | 4 |
| Respondent 356 | 3 | 3 | 5 | 5 | 2 | 3 | 3 | 5 | 3 | 2 | 4 | 2 |
| Respondent 357 | 4 | 2 | 4 | 3 | 2 | 4 | 3 | 4 | 3 | 3 | 3 | 5 |
| Respondent 358 | 2 | 2 | 3 | 2 | 3 | 3 | 3 | 3 | 3 | 5 | 3 | 4 |
| Respondent 359 | 2 | 3 | 4 | 3 | 2 | 3 | 3 | 5 | 4 | 3 | 2 | 4 |
| Respondent 360 | 2 | 4 | 3 | 2 | 2 | 4 | 2 | 4 | 3 | 3 | 2 | 3 |
| Respondent 361 | 2 | 3 | 4 | 4 | 3 | 3 | 4 | 3 | 3 | 3 | 3 | 4 |
| Respondent 362 | 4 | 2 | 5 | 4 | 3 | 3 | 4 | 3 | 4 | 4 | 4 | 3 |
| Respondent 363 | 4 | 3 | 3 | 3 | 4 | 2 | 3 | 3 | 4 | 3 | 3 | 4 |
| Respondent 364 | 3 | 4 | 4 | 3 | 3 | 3 | 4 | 3 | 2 | 5 | 2 | 5 |
| Respondent 365 | 2 | 3 | 4 | 4 | 5 | 4 | 2 | 4 | 2 | 4 | 4 | 4 |
| Respondent 366 | 4 | 4 | 2 | 2 | 2 | 2 | 4 | 3 | 4 | 3 | 4 | 4 |
| Respondent 367 | 2 | 3 | 4 | 3 | 3 | 3 | 5 | 3 | 2 | 2 | 4 | 2 |
| Respondent 368 | 2 | 4 | 3 | 2 | 4 | 2 | 4 | 4 | 2 | 4 | 2 | 5 |
| Respondent 369 | 3 | 4 | 2 | 2 | 3 | 3 | 4 | 4 | 3 | 3 | 3 | 3 |
| Respondent 370 | 3 | 2 | 3 | 4 | 4 | 2 | 4 | 2 | 5 | 3 | 4 | 4 |
| Respondent 371 | 2 | 3 | 3 | 5 | 2 | 2 | 3 | 2 | 3 | 2 | 4 | 2 |
| Respondent 372 | 2 | 4 | 3 | 2 | 2 | 3 | 4 | 3 | 3 | 2 | 3 | 4 |
| Respondent 373 | 3 | 3 | 3 | 3 | 2 | 4 | 3 | 5 | 3 | 3 | 4 | 3 |
| Respondent 374 | 2 | 3 | 3 | 3 | 2 | 3 | 4 | 3 | 4 | 4 | 3 | 5 |
| Respondent 375 | 2 | 4 | 2 | 2 | 4 | 2 | 4 | 4 | 3 | 3 | 4 | 5 |

|                |   |   |   |   |   |   |   |   |   |   |   |   |
|----------------|---|---|---|---|---|---|---|---|---|---|---|---|
| Respondent 376 | 3 | 3 | 4 | 2 | 4 | 3 | 3 | 3 | 5 | 2 | 5 | 3 |
| Respondent 377 | 3 | 3 | 4 | 4 | 3 | 4 | 4 | 4 | 3 | 4 | 4 | 4 |
| Respondent 378 | 3 | 2 | 3 | 2 | 2 | 3 | 4 | 4 | 4 | 4 | 3 | 4 |
| Respondent 379 | 3 | 3 | 4 | 5 | 4 | 4 | 3 | 5 | 2 | 5 | 4 | 2 |
| Respondent 380 | 4 | 2 | 4 | 3 | 2 | 3 | 4 | 3 | 2 | 3 | 3 | 4 |
| Respondent 381 | 2 | 2 | 3 | 2 | 2 | 4 | 3 | 4 | 3 | 4 | 4 | 3 |
| Respondent 382 | 2 | 3 | 4 | 3 | 3 | 4 | 2 | 4 | 5 | 4 | 4 | 4 |
| Respondent 383 | 2 | 4 | 3 | 2 | 3 | 3 | 3 | 3 | 3 | 3 | 2 | 3 |
| Respondent 384 | 3 | 2 | 3 | 4 | 2 | 3 | 3 | 5 | 3 | 5 | 3 | 5 |
| Respondent 385 | 4 | 2 | 5 | 4 | 2 | 4 | 3 | 4 | 3 | 4 | 4 | 3 |
| Respondent 386 | 4 | 3 | 3 | 3 | 3 | 3 | 4 | 3 | 4 | 3 | 3 | 5 |
| Respondent 387 | 3 | 4 | 4 | 3 | 2 | 3 | 3 | 5 | 3 | 5 | 3 | 3 |
| Respondent 388 | 4 | 2 | 4 | 3 | 2 | 4 | 3 | 4 | 5 | 4 | 4 | 5 |
| Respondent 389 | 2 | 2 | 3 | 2 | 3 | 3 | 4 | 3 | 3 | 3 | 3 | 4 |
| Respondent 390 | 2 | 3 | 4 | 3 | 3 | 3 | 4 | 3 | 4 | 3 | 3 | 4 |
| Respondent 391 | 2 | 4 | 3 | 2 | 4 | 2 | 3 | 3 | 4 | 3 | 1 | 3 |
| Respondent 393 | 2 | 3 | 4 | 4 | 3 | 3 | 4 | 3 | 3 | 3 | 3 | 4 |
| Respondent 394 | 4 | 2 | 5 | 4 | 5 | 4 | 3 | 4 | 5 | 4 | 4 | 3 |
| Respondent 395 | 4 | 3 | 3 | 3 | 2 | 2 | 4 | 3 | 4 | 3 | 2 | 4 |
| Respondent 396 | 3 | 4 | 4 | 3 | 3 | 3 | 4 | 3 | 3 | 3 | 3 | 5 |
| Respondent 397 | 2 | 3 | 4 | 4 | 2 | 3 | 4 | 4 | 5 | 4 | 2 | 4 |
| Respondent 398 | 4 | 4 | 2 | 2 | 3 | 3 | 4 | 4 | 4 | 4 | 3 | 4 |
| Respondent 399 | 2 | 3 | 4 | 3 | 4 | 2 | 4 | 2 | 3 | 2 | 2 | 4 |
| Respondent 400 | 2 | 4 | 3 | 2 | 3 | 2 | 3 | 2 | 3 | 2 | 4 | 2 |
| Respondent 401 | 3 | 4 | 2 | 2 | 2 | 3 | 4 | 3 | 3 | 3 | 3 | 3 |
| Respondent 402 | 3 | 2 | 3 | 4 | 2 | 4 | 3 | 5 | 3 | 5 | 3 | 4 |
| Respondent 403 | 3 | 3 | 3 | 3 | 2 | 3 | 4 | 3 | 4 | 3 | 2 | 4 |
| Respondent 404 | 2 | 3 | 3 | 3 | 3 | 2 | 5 | 3 | 3 | 3 | 2 | 3 |
| Respondent 405 | 2 | 4 | 2 | 2 | 4 | 2 | 3 | 3 | 3 | 3 | 3 | 4 |
| Respondent 406 | 3 | 3 | 4 | 2 | 3 | 4 | 4 | 4 | 4 | 4 | 4 | 3 |
| Respondent 407 | 3 | 3 | 4 | 4 | 2 | 3 | 3 | 3 | 4 | 3 | 3 | 4 |
| Respondent 408 | 3 | 2 | 3 | 2 | 4 | 4 | 2 | 5 | 2 | 5 | 2 | 5 |
| Respondent 409 | 3 | 3 | 4 | 5 | 3 | 3 | 3 | 3 | 2 | 4 | 4 | 4 |
| Respondent 410 | 4 | 2 | 4 | 3 | 3 | 3 | 4 | 4 | 4 | 3 | 4 | 5 |
| Respondent 411 | 3 | 3 | 4 | 5 | 4 | 2 | 4 | 2 | 2 | 2 | 4 | 2 |
| Respondent 412 | 4 | 2 | 4 | 3 | 2 | 2 | 3 | 2 | 2 | 4 | 2 | 5 |
| Respondent 413 | 2 | 2 | 3 | 2 | 2 | 3 | 4 | 3 | 3 | 3 | 3 | 3 |
| Respondent 414 | 2 | 3 | 4 | 3 | 2 | 4 | 3 | 5 | 5 | 3 | 4 | 4 |
| Respondent 415 | 2 | 4 | 3 | 2 | 2 | 3 | 4 | 3 | 3 | 2 | 4 | 3 |
| Respondent 416 | 2 | 3 | 4 | 4 | 4 | 2 | 5 | 3 | 3 | 2 | 3 | 2 |
| Respondent 417 | 4 | 2 | 5 | 4 | 4 | 3 | 3 | 3 | 3 | 3 | 4 | 3 |

***Response to questionnaire (37-39)***

Response of their turnover intention

[1=Very unlikely, 2=Unlikely, 3=Likely, 4=Very likely]

|               | Opinion |
|---------------|---------|
| Respondent 1  | 1       |
| Respondent 2  | 3       |
| Respondent 3  | 1       |
| Respondent 4  | 2       |
| Respondent 5  | 3       |
| Respondent 6  | 1       |
| Respondent 7  | 3       |
| Respondent 8  | 3       |
| Respondent 9  | 1       |
| Respondent 10 | 2       |
| Respondent 11 | 4       |
| Respondent 12 | 1       |
| Respondent 13 | 3       |
| Respondent 14 | 4       |
| Respondent 15 | 3       |
| Respondent 16 | 3       |
| Respondent 17 | 4       |
| Respondent 18 | 3       |
| Respondent 19 | 2       |
| Respondent 20 | 3       |
| Respondent 21 | 4       |
| Respondent 22 | 1       |
| Respondent 23 | 3       |
| Respondent 24 | 2       |
| Respondent 25 | 4       |
| Respondent 26 | 3       |
| Respondent 27 | 3       |
| Respondent 28 | 3       |
| Respondent 29 | 2       |
| Respondent 30 | 3       |
| Respondent 31 | 4       |
| Respondent 32 | 3       |
| Respondent 33 | 1       |
| Respondent 34 | 2       |
| Respondent 35 | 3       |
| Respondent 36 | 3       |
| Respondent 37 | 1       |
| Respondent 38 | 4       |
| Respondent 39 | 3       |
| Respondent 40 | 2       |
| Respondent 41 | 4       |
| Respondent 42 | 1       |
| Respondent 43 | 3       |
| Respondent 44 | 4       |
| Respondent 45 | 2       |

|               |   |
|---------------|---|
| Respondent 46 | 3 |
| Respondent 47 | 1 |
| Respondent 48 | 4 |
| Respondent 49 | 4 |
| Respondent 50 | 3 |
| Respondent 51 | 2 |
| Respondent 52 | 1 |
| Respondent 53 | 3 |
| Respondent 54 | 4 |
| Respondent 55 | 3 |
| Respondent 56 | 2 |
| Respondent 57 | 3 |
| Respondent 58 | 4 |
| Respondent 59 | 1 |
| Respondent 60 | 3 |
| Respondent 61 | 4 |
| Respondent 62 | 3 |
| Respondent 63 | 1 |
| Respondent 64 | 2 |
| Respondent 65 | 4 |
| Respondent 66 | 4 |
| Respondent 67 | 1 |
| Respondent 68 | 3 |
| Respondent 69 | 4 |
| Respondent 70 | 4 |
| Respondent 71 | 1 |
| Respondent 72 | 4 |
| Respondent 73 | 3 |
| Respondent 74 | 1 |
| Respondent 75 | 4 |
| Respondent 76 | 1 |
| Respondent 77 | 1 |
| Respondent 78 | 4 |
| Respondent 79 | 3 |
| Respondent 80 | 4 |
| Respondent 81 | 1 |
| Respondent 82 | 3 |
| Respondent 83 | 4 |
| Respondent 84 | 2 |
| Respondent 85 | 3 |
| Respondent 86 | 4 |
| Respondent 87 | 4 |
| Respondent 88 | 1 |
| Respondent 89 | 4 |
| Respondent 90 | 1 |
| Respondent 91 | 3 |
| Respondent 92 | 4 |
| Respondent 93 | 4 |
| Respondent 94 | 1 |
| Respondent 95 | 1 |
| Respondent 96 | 4 |
| Respondent 97 | 1 |
| Respondent 98 | 4 |
| Respondent 99 | 2 |

|                |   |
|----------------|---|
| Respondent 100 | 4 |
| Respondent 101 | 1 |
| Respondent 102 | 3 |
| Respondent 103 | 4 |
| Respondent 104 | 4 |
| Respondent 105 | 1 |
| Respondent 106 | 3 |
| Respondent 107 | 4 |
| Respondent 108 | 3 |
| Respondent 109 | 1 |
| Respondent 110 | 4 |
| Respondent 111 | 3 |
| Respondent 112 | 1 |
| Respondent 113 | 4 |
| Respondent 114 | 3 |
| Respondent 115 | 1 |
| Respondent 116 | 4 |
| Respondent 117 | 3 |
| Respondent 118 | 1 |
| Respondent 119 | 3 |
| Respondent 120 | 2 |
| Respondent 121 | 3 |
| Respondent 122 | 4 |
| Respondent 123 | 1 |
| Respondent 124 | 3 |
| Respondent 125 | 4 |
| Respondent 126 | 3 |
| Respondent 127 | 2 |
| Respondent 128 | 4 |
| Respondent 129 | 3 |
| Respondent 130 | 2 |
| Respondent 131 | 4 |
| Respondent 132 | 1 |
| Respondent 133 | 1 |
| Respondent 134 | 3 |
| Respondent 135 | 4 |
| Respondent 136 | 1 |
| Respondent 137 | 3 |
| Respondent 138 | 4 |
| Respondent 139 | 1 |
| Respondent 140 | 3 |
| Respondent 141 | 4 |
| Respondent 142 | 1 |
| Respondent 143 | 3 |
| Respondent 144 | 4 |
| Respondent 145 | 1 |
| Respondent 146 | 3 |
| Respondent 147 | 1 |
| Respondent 148 | 3 |
| Respondent 149 | 4 |
| Respondent 150 | 1 |
| Respondent 151 | 3 |
| Respondent 152 | 4 |
| Respondent 153 | 1 |

|                |   |
|----------------|---|
| Respondent 154 | 3 |
| Respondent 155 | 4 |
| Respondent 156 | 3 |
| Respondent 157 | 1 |
| Respondent 158 | 3 |
| Respondent 159 | 4 |
| Respondent 160 | 1 |
| Respondent 161 | 3 |
| Respondent 162 | 4 |
| Respondent 163 | 2 |
| Respondent 164 | 1 |
| Respondent 165 | 3 |
| Respondent 166 | 3 |
| Respondent 167 | 1 |
| Respondent 168 | 3 |
| Respondent 169 | 4 |
| Respondent 170 | 3 |
| Respondent 171 | 1 |
| Respondent 172 | 3 |
| Respondent 173 | 2 |
| Respondent 174 | 1 |
| Respondent 175 | 3 |
| Respondent 176 | 4 |
| Respondent 177 | 1 |
| Respondent 178 | 3 |
| Respondent 179 | 4 |
| Respondent 180 | 2 |
| Respondent 181 | 1 |
| Respondent 182 | 3 |
| Respondent 183 | 4 |
| Respondent 184 | 3 |
| Respondent 185 | 4 |
| Respondent 186 | 2 |
| Respondent 187 | 1 |
| Respondent 188 | 3 |
| Respondent 189 | 3 |
| Respondent 190 | 4 |
| Respondent 191 | 2 |
| Respondent 192 | 1 |
| Respondent 193 | 3 |
| Respondent 194 | 4 |
| Respondent 195 | 3 |
| Respondent 196 | 1 |
| Respondent 197 | 2 |
| Respondent 198 | 3 |
| Respondent 199 | 4 |
| Respondent 200 | 4 |
| Respondent 201 | 2 |
| Respondent 202 | 1 |
| Respondent 203 | 3 |
| Respondent 204 | 4 |
| Respondent 205 | 3 |
| Respondent 206 | 1 |
| Respondent 207 | 4 |

|                |   |
|----------------|---|
| Respondent 208 | 3 |
| Respondent 209 | 4 |
| Respondent 210 | 4 |
| Respondent 211 | 1 |
| Respondent 212 | 3 |
| Respondent 213 | 3 |
| Respondent 214 | 4 |
| Respondent 215 | 3 |
| Respondent 216 | 1 |
| Respondent 217 | 3 |
| Respondent 218 | 3 |
| Respondent 219 | 1 |
| Respondent 220 | 4 |
| Respondent 221 | 4 |
| Respondent 222 | 3 |
| Respondent 223 | 1 |
| Respondent 224 | 3 |
| Respondent 225 | 4 |
| Respondent 226 | 3 |
| Respondent 227 | 1 |
| Respondent 228 | 3 |
| Respondent 229 | 4 |
| Respondent 230 | 4 |
| Respondent 231 | 1 |
| Respondent 232 | 3 |
| Respondent 233 | 4 |
| Respondent 234 | 4 |
| Respondent 235 | 1 |
| Respondent 236 | 3 |
| Respondent 237 | 2 |
| Respondent 238 | 4 |
| Respondent 239 | 1 |
| Respondent 240 | 4 |
| Respondent 241 | 2 |
| Respondent 242 | 4 |
| Respondent 243 | 1 |
| Respondent 244 | 3 |
| Respondent 245 | 4 |
| Respondent 246 | 1 |
| Respondent 247 | 3 |
| Respondent 248 | 2 |
| Respondent 249 | 3 |
| Respondent 250 | 4 |
| Respondent 251 | 1 |
| Respondent 252 | 3 |
| Respondent 253 | 4 |
| Respondent 254 | 3 |
| Respondent 255 | 4 |
| Respondent 256 | 1 |
| Respondent 257 | 3 |
| Respondent 258 | 2 |
| Respondent 259 | 4 |
| Respondent 260 | 4 |
| Respondent 261 | 1 |

|                |   |
|----------------|---|
| Respondent 262 | 2 |
| Respondent 263 | 4 |
| Respondent 264 | 3 |
| Respondent 265 | 4 |
| Respondent 266 | 1 |
| Respondent 267 | 3 |
| Respondent 268 | 4 |
| Respondent 269 | 3 |
| Respondent 270 | 4 |
| Respondent 271 | 1 |
| Respondent 272 | 2 |
| Respondent 273 | 3 |
| Respondent 274 | 4 |
| Respondent 275 | 1 |
| Respondent 276 | 2 |
| Respondent 277 | 3 |
| Respondent 278 | 4 |
| Respondent 279 | 3 |
| Respondent 280 | 1 |
| Respondent 281 | 2 |
| Respondent 282 | 3 |
| Respondent 283 | 4 |
| Respondent 284 | 4 |
| Respondent 285 | 2 |
| Respondent 286 | 4 |
| Respondent 287 | 2 |
| Respondent 288 | 3 |
| Respondent 289 | 4 |
| Respondent 290 | 2 |
| Respondent 291 | 3 |
| Respondent 292 | 4 |
| Respondent 293 | 3 |
| Respondent 294 | 1 |
| Respondent 295 | 3 |
| Respondent 296 | 3 |
| Respondent 297 | 4 |
| Respondent 298 | 2 |
| Respondent 299 | 3 |
| Respondent 300 | 4 |
| Respondent 301 | 1 |
| Respondent 302 | 4 |
| Respondent 303 | 3 |
| Respondent 304 | 2 |
| Respondent 305 | 3 |
| Respondent 306 | 3 |
| Respondent 307 | 1 |
| Respondent 308 | 2 |
| Respondent 309 | 4 |
| Respondent 310 | 2 |
| Respondent 311 | 2 |
| Respondent 312 | 3 |
| Respondent 313 | 2 |
| Respondent 314 | 3 |
| Respondent 315 | 4 |

|                |   |
|----------------|---|
| Respondent 316 | 1 |
| Respondent 317 | 2 |
| Respondent 318 | 3 |
| Respondent 319 | 2 |
| Respondent 320 | 3 |
| Respondent 321 | 1 |
| Respondent 322 | 4 |
| Respondent 323 | 2 |
| Respondent 324 | 2 |
| Respondent 325 | 3 |
| Respondent 326 | 1 |
| Respondent 327 | 3 |
| Respondent 328 | 3 |
| Respondent 329 | 2 |
| Respondent 330 | 2 |
| Respondent 331 | 1 |
| Respondent 332 | 2 |
| Respondent 333 | 3 |
| Respondent 334 | 3 |
| Respondent 335 | 2 |
| Respondent 336 | 1 |
| Respondent 337 | 3 |
| Respondent 338 | 2 |
| Respondent 339 | 4 |
| Respondent 340 | 2 |
| Respondent 341 | 1 |
| Respondent 342 | 3 |
| Respondent 343 | 2 |
| Respondent 344 | 3 |
| Respondent 345 | 1 |
| Respondent 346 | 4 |
| Respondent 347 | 2 |
| Respondent 348 | 2 |
| Respondent 349 | 1 |
| Respondent 350 | 3 |
| Respondent 351 | 3 |
| Respondent 352 | 2 |
| Respondent 353 | 1 |
| Respondent 354 | 3 |
| Respondent 355 | 4 |
| Respondent 356 | 2 |
| Respondent 357 | 2 |
| Respondent 358 | 3 |
| Respondent 359 | 3 |
| Respondent 360 | 2 |
| Respondent 361 | 3 |
| Respondent 362 | 3 |
| Respondent 363 | 2 |
| Respondent 364 | 1 |
| Respondent 365 | 3 |
| Respondent 366 | 2 |
| Respondent 367 | 3 |
| Respondent 368 | 3 |
| Respondent 369 | 2 |

|                |   |
|----------------|---|
| Respondent 370 | 1 |
| Respondent 371 | 3 |
| Respondent 372 | 3 |
| Respondent 373 | 2 |
| Respondent 374 | 2 |
| Respondent 375 | 2 |
| Respondent 376 | 3 |
| Respondent 377 | 2 |
| Respondent 378 | 3 |
| Respondent 379 | 1 |
| Respondent 380 | 4 |
| Respondent 381 | 2 |
| Respondent 382 | 3 |
| Respondent 383 | 1 |
| Respondent 384 | 3 |
| Respondent 385 | 3 |
| Respondent 386 | 2 |
| Respondent 387 | 3 |
| Respondent 388 | 3 |
| Respondent 389 | 1 |
| Respondent 390 | 3 |
| Respondent 391 | 2 |
| Respondent 393 | 3 |
| Respondent 394 | 2 |
| Respondent 395 | 1 |
| Respondent 396 | 3 |
| Respondent 397 | 2 |
| Respondent 398 | 4 |
| Respondent 399 | 1 |
| Respondent 400 | 3 |
| Respondent 401 | 3 |
| Respondent 402 | 4 |
| Respondent 403 | 1 |
| Respondent 404 | 3 |
| Respondent 405 | 4 |
| Respondent 406 | 3 |
| Respondent 407 | 1 |
| Respondent 408 | 3 |
| Respondent 409 | 3 |
| Respondent 410 | 2 |
| Respondent 411 | 1 |
| Respondent 412 | 3 |
| Respondent 413 | 2 |
| Respondent 414 | 3 |
| Respondent 415 | 3 |
| Respondent 416 | 1 |
| Respondent 417 | 3 |
